# Supplementary material
Source: publisher site journal article supplement (https://www.dovepress.com/article/600570)
Supplement: Supplementary file 1 [file Supplementary%20Materials%20-%20Tables%20Figures.docx]

Structural and Functional Brain Alterations in Postherpetic Neuralgia: A Systematic Review and Voxel-wise Coordinate-Based Meta-analysis via the SDM-PSI Method

Supplementary Documents

Contents

[1.PRISMA 2020 Checklist 1](#_Toc228983248)

[Supplementary Table 1. Checklists of PRISMA statement for reporting meta-analysis 1](#_Toc228983249)

[2. Methods 7](#_Toc228983250)

[**2.1** Literature Search Strategy 7](#_Toc228983251)

[Supplementary Table 2. Detail search strategy of five databases 7](#_Toc228983252)

[**2.2** Data Extraction 10](#_Toc228983253)

[Supplementary Table 3. Demographic, clinical, and imaging characteristics of studies included in the functional rs-fMRI and structural VBM meta-analyses. 10](#_Toc228983254)

[**2.3** Neuroimaging data synthesis and coding 12](#_Toc228983255)

[Supplementary Table 4. Data of the peak coordinates, effect size and their original studies 12](#_Toc228983256)

[**2.4** Quality Assessment 25](#_Toc228983257)

[Supplementary Table 5. Quality Assessment of included studies in the rs-fMRI/VBM meta-analysis 25](#_Toc228983258)

[3. Results 27](#_Toc228983259)

[**3.1 Glass-brain visualizations** 27](#_Toc228983260)

[Supplementary Figure 1. Glass-brain visualization of functional alterations in PHN versus HC (*P*TFCE < 0.05). 27](#_Toc228983261)

[Supplementary Figure 2. Glass-brain visualization of structural alterations in PHN versus HC (*P*TFCE < 0.05). 27](#_Toc228983262)

[Supplementary Figure 3. Glass-brain visualization of functional alterations in PHN versus HZ patients (*P*TFCE < 0.05). 28](#_Toc228983263)

[Supplementary Figure 4. Glass-brain visualization of longitudinal functional alterations in PHN pre- and post-treatment (*P*TFCE < 0.05). 28](#_Toc228983264)

[**3.2**. Jack-knife sensitivity analysis 29](#_Toc228983265)

[Supplementary Table 6. Jack-knife Sensitivity Analysis for rs-fMRI Meta-Analysis (PHN vs HC, *P*uncorrected < 0.005) 29](#_Toc228983266)

[Supplementary Table 7. Jack-knife Sensitivity Analysis for rs-fMRI Meta-Analysis (PHN vs HC, *P*TFCE < 0.05) 29](#_Toc228983267)

[Supplementary Table 8. Jack-knife Sensitivity Analysis for VBM Structural MRI Meta-Analysis (PHN vs HC, *P*uncorrected < 0.005) 30](#_Toc228983268)

[Supplementary Table 9. Jack-knife Sensitivity Analysis for VBM Structural Meta-Analysis (PHN vs HC, *P*TFCE < 0.05) 30](#_Toc228983269)

[Supplementary Table 10. Jack-knife Sensitivity Analysis for comparisons PHN vs HC 31](#_Toc228983270)

[Supplementary Table 11. Jack-knife Sensitivity Analysis for rs-fMRI Meta-Analysis (PHN vs HZ, *P*uncorrected < 0.005) 31](#_Toc228983271)

[Supplementary Table 12. Jack-knife Sensitivity Analysis for rs-fMRI Meta-Analysis (PHN vs HZ, *P*TFCE < 0.05) 31](#_Toc228983272)

[Supplementary Table 13. Jack-knife Sensitivity Analysis Results for PHN vs. HZ Comparison 32](#_Toc228983273)

[Supplementary Table 14. Jack-knife Sensitivity Analysis for rs-fMRI Meta-Analysis (PHN Pre- and Post-Treatment, *P*uncorrected < 0.005, *P*TFCE < 0.05) 32](#_Toc228983274)

[Supplementary Table 15. Jack-knife Sensitivity Analysis Results for PHN Pre- and Post-Treatment Comparison 32](#_Toc228983275)

[**3.3** Analysis of Heterogeneity and Publication Bias 33](#_Toc228983276)

[Supplementary Table 16. Summary of Meta-Analytic Results: Effect Sizes, Heterogeneity, and Publication Bias for PHN Comparisons Across Functional and Structural Imaging Modalities 33](#_Toc228983277)

[Supplementary Figures 5–15. Funnel plots for publication bias assessment in PHN versus HC and PHN versus HZ comparisons. 34](#_Toc228983278)

[**3.4** Meta-regression Analysis 37](#_Toc228983279)

[Supplementary Table 17. Meta-regression results for demographic and clinical moderators in PHN 37](#_Toc228983280)

[References： 38](#_Toc228983281)

#
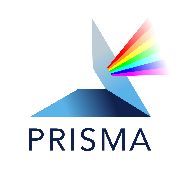
 1.PRISMA 2020 Checklist

### **Supplementary Table 1.** Checklists of PRISMA statement for reporting meta-analysis

| **Section and Topic** | **Item #** | **Checklist item** | **Location where item is reported** |
| --- | --- | --- | --- |
| **TITLE** | | |  |
| Title | 1 | Identify the report as a systematic review (Meta-analysis). | Cover |
| **ABSTRACT** | | |  |
| Abstract | 2 | Provide a structured summary including, as applicable: background; objectives; data sources; study eligibility criteria, participants, and interventions; study appraisal and synthesis methods; results; limitations; conclusions and implications of key findings; systematic review registration number. | Abstract |
| **INTRODUCTION** | | |  |
| Rationale | 3 | Describe the rationale for the review in the context of existing knowledge. | **1.** Introduction |
| Objectives | 4 | Provide an explicit statement of the objective(s) or question(s) the review addresses. | **1.** Introduction |
| **METHODS** | | | **2.** Methods |
| Eligibility criteria | 5 | Specify the inclusion and exclusion criteria for the review and how studies were grouped for the syntheses. | **2.2** Eligibility and exclusion criteria |
| Information sources | 6 | Specify all databases, registers, websites, organisations, reference lists and other sources searched or consulted to identify studies. Specify the date when each source was last searched or consulted. | **2.1** Search strategy |
| Search strategy | 7 | Present the full search strategies for all databases, registers and websites, including any filters and limits used. | **Supplementary Table 2** |
| Selection process | 8 | Specify the methods used to decide whether a study met the inclusion criteria of the review, including how many reviewers screened each record and each report retrieved, whether they worked independently, and if applicable, details of automation tools used in the process. | **2.1** Search strategy;  **2.3** Data extraction;  **Supplementary Table 2** |
| Data collection process | 9 | Specify the methods used to collect data from reports, including how many reviewers collected data from each report, whether they worked independently, any processes for obtaining or confirming data from study investigators, and if applicable, details of automation tools used in the process. | **2.1** Search strategy;  **2.3** Data extraction; |
| Data items | 10a | List and define all outcomes for which data were sought. Specify whether all results that were compatible with each outcome domain in each study were sought (e.g. for all measures, time points, analyses), and if not, the methods used to decide which results to collect. | **2.3** Data extraction;  **2.6** Voxel-wise meta-analysis of functional differences;  **2.7** Voxel-wise meta-analysis of structural differences |
|  | 10b | List and define all other variables for which data were sought (e.g. participant and intervention characteristics, funding sources). Describe any assumptions made about any missing or unclear information. | **2.3** Data extraction;  **2.4** Neuroimaging data synthesis and coding |
| Study risk of bias assessment | 11 | Specify the methods used to assess risk of bias in the included studies, including details of the tool(s) used, how many reviewers assessed each study and whether they worked independently, and if applicable, details of automation tools used in the process. | **2.5** Quality assessment |
| Effect measures | 12 | Specify for each outcome the effect measure(s) (e.g. risk ratio, mean difference) used in the synthesis or presentation of results. | **2.6** Voxel-wise meta-analysis of functional differences;  **2.7** Voxel-wise meta-analysis of structural differences;  **2.8** Robustness, heterogeneity, and publication bias analysis;  **2.9** Meta-regression analyses |
| Synthesis methods | 13a | Describe the processes used to decide which studies were eligible for each synthesis (e.g. tabulating the study intervention characteristics and comparing against the planned groups for each synthesis (item #5)). |
| 13b | Describe any methods required to prepare the data for presentation or synthesis, such as handling of missing summary statistics, or data conversions. |
| 13c | Describe any methods used to tabulate or visually display results of individual studies and syntheses. |
| 13d | Describe any methods used to synthesize results and provide a rationale for the choice(s). If meta-analysis was performed, describe the model(s), method(s) to identify the presence and extent of statistical heterogeneity, and software package(s) used. |
| 13e | Describe any methods used to explore possible causes of heterogeneity among study results (e.g. subgroup analysis, meta-regression). |
| 13f | Describe any sensitivity analyses conducted to assess robustness of the synthesized results. |
| Reporting bias assessment | 14 | Describe any methods used to assess risk of bias due to missing results in a synthesis (arising from reporting biases). | **2.8** Robustness, heterogeneity, and publication bias analysis |
| Certainty assessment | 15 | Describe any methods used to assess certainty (or confidence) in the body of evidence for an outcome. | Not applicable |
| **RESULTS** | | | **3.** Results |
| Study selection | 16a | Describe the results of the search and selection process, from the number of records identified in the search to the number of studies included in the review, ideally using a flow diagram. | **Figure 1**:PRISMA 2020 flow diagram.;  **3.1** Included studies and sample characteristics: **Table 1** |
| 16b | Cite studies that might appear to meet the inclusion criteria, but which were excluded, and explain why they were excluded. | **3.1** Included studies and sample characteristics: **Table 1** |
| Study characteristics | 17 | Cite each included study and present its characteristics. | **Supplementary Table 3** |
| Risk of bias in studies | 18 | Present assessments of risk of bias for each included study. | **Supplementary**  **Table 5** |
| Results of individual studies | 19 | For all outcomes, present, for each study: (a) summary statistics for each group (where appropriate) and (b) an effect estimate and its precision (e.g. confidence/credible interval), ideally using structured tables or plots. | **3.2** Functional and structural abnormalities among included studies:**Table 2, Figure 2a, Figure 2b, Figure 3, Figure 4, Supplementary Figures 1–4** |
| Results of syntheses | 20a | For each synthesis, briefly summarise the characteristics and risk of bias among contributing studies. | **3.1** Included studies and sample characteristics: **Table 1** |
| 20b | Present results of all statistical syntheses conducted. If meta-analysis was done, present for each the summary estimate and its precision (e.g. confidence/credible interval) and measures of statistical heterogeneity. If comparing groups, describe the direction of the effect. | **3.2** Functional and structural abnormalities among included studies: **Table 2** |
| 20c | Present results of all investigations of possible causes of heterogeneity among study results. | **Supplementary Table 16** |
| 20d | Present results of all sensitivity analyses conducted to assess the robustness of the synthesized results. | **Supplementary Tables 6–15** |
| Reporting biases | 21 | Present assessments of risk of bias due to missing results (arising from reporting biases) for each synthesis assessed. | **Supplementary Table 16;**  **Supplementary Figures 5–15** |
| Certainty of evidence | 22 | Present assessments of certainty (or confidence) in the body of evidence for each outcome assessed. | Not assessed |
| **DISCUSSION** | | |  |
| Discussion | 23a | Provide a general interpretation of the results in the context of other evidence. | **4.** Discussion |
| 23b | Discuss any limitations of the evidence included in the review. | **6.** Limitations |
| 23c | Discuss any limitations of the review processes used. | **6.** Limitations |
| 23d | Discuss implications of the results for practice, policy, and future research. | **4.** Discussion |
| **OTHER INFORMATION** | | |  |
| Registration and protocol | 24a | Provide registration information for the review, including register name and registration number, or state that the review was not registered. | PROSPERO registration  (CRD420251030103) |
| 24b | Indicate where the review protocol can be accessed, or state that a protocol was not prepared. | No protocol prepared |
| 24c | Describe and explain any amendments to information provided at registration or in the protocol. |
| Support | 25 | Describe sources of financial or non-financial support for the review, and the role of the funders or sponsors in the review. | Beijing Traditional Chinese Medicine Science and Technology Development Fund  (BJZZYB-2023-11);  National Natural Science Foundation of China  (Grant No. 82374555) |
| Competing interests | 26 | Declare any competing interests of review authors. | The authors declare no competing interests |
| Availability of data, code and other materials | 27 | Report which of the following are publicly available and where they can be found: template data collection forms; data extracted from included studies; data used for all analyses; analytic code; any other materials used in the review. | **2.4** Neuroimaging data synthesis and coding |

*From:*  Page MJ, McKenzie JE, Bossuyt PM, Boutron I, Hoffmann TC, Mulrow CD, et al. The PRISMA 2020 statement: an updated guideline for reporting systematic reviews. BMJ 2021;372:n71. doi: 10.1136/bmj.n71. This work is licensed under CC BY 4.0. To view a copy of this license, visit <https://creativecommons.org/licenses/by/4.0/>

# 2. Methods

## **2.1** Literature Search Strategy

### **Supplementary Table 2.** Detail search strategy of five databases

| **Functional and Structural indicator** | |
| --- | --- |
| **PubMed** | <https://pubmed.ncbi.nlm.nih.gov/> |
| postherpetic neuralgia[Title/Abstract] OR PHN[Title/Abstract] OR herpes zoster neuralgia[Title/Abstract] OR zoster-associated pain[Title/Abstract] OR herpes zoster pain[Title/Abstract] OR post-shingles pain[Title/Abstract]）AND (fMRI OR functional magnetic resonance imaging OR MRI OR magnetic resonance imaging OR VBM OR voxel-based morphometry OR SBM OR surface-based morphometry OR source-based morphometry OR ASL OR arterial spin labeling OR rs-fMRI OR resting-state fMRI OR functional connectivity OR task-fMRI OR ALFF OR amplitude of low-frequency fluctuation OR fALFF OR fractional amplitude of low-frequency fluctuation OR ReHo OR regional homogeneity OR DTI OR diffusion tensor imaging OR neuroimaging OR brain morphometry OR structural connectivity OR WMV OR White matter OR GMV OR gray matter volume OR SPECT OR single-photon emission computed tomography OR PET OR positron emission tomography OR MRS OR magnetic resonance spectroscopy OR NIRS OR near-infrared spectroscopy) | |
| **Web of Science** | <https://www.webofscience.com/> |
| #1. TS=(postherpetic neuralgia OR PHN OR herpes zoster neuralgia OR zoster-associated pain OR herpes zoster pain OR post-shingles pain)  #2. TI=(postherpetic neuralgia OR PHN OR herpes zoster neuralgia OR zoster-associated pain OR herpes zoster pain OR post-shingles pain)  #4. AB=(postherpetic neuralgia OR PHN OR herpes zoster neuralgia OR zoster-associated pain OR herpes zoster pain OR post-shingles pain)  #5. KP=(postherpetic neuralgia OR PHN OR herpes zoster neuralgia OR zoster-associated pain OR herpes zoster pain OR post-shingles pain)  #6. ALL=(fMRI OR functional magnetic resonance imaging OR MRI OR magnetic resonance imaging OR VBM OR voxel-based morphometry OR SBM OR surface-based morphometry OR source-based morphometry OR ASL OR arterial spin labeling OR rs-fMRI OR resting-state fMRI OR functional connectivity OR task-fMRI OR ALFF OR amplitude of low-frequency fluctuation OR fALFF OR fractional amplitude of low-frequency fluctuation OR ReHo OR regional homogeneity OR DTI OR diffusion tensor imaging OR neuroimaging OR GMV OR gray matter volume)  #7. ALL=(WMV OR White matter OR brain morphometry OR structural connectivity OR SPECT OR single-photon emission computed tomography OR PET OR positron emission tomography OR MRS OR magnetic resonance spectroscopy OR NIRS OR near-infrared spectroscopy)  #1 AND #6 OR #1 AND #7  #2 AND #6 OR #2 AND #7  #4 AND #6 OR #4 AND #7  #5 AND #6 OR #5 AND #7 | |
| **Embase** | <https://www.embase.com/> |
| #2. （'postherpetic neuralgia':ti,ab,kw OR 'phn':ti,ab,kw OR 'herpes zoster neuralgia':ti,ab,kw OR 'zoster-associated pain':ti,ab,kw OR 'herpes zoster pain':ti,ab,kw）  #3 .（'postherpetic neuralgia':ab,ti OR 'phn':ab,ti OR 'herpes zoster neuralgia':ab,ti OR 'zoster-associated pain':ab,ti OR 'herpes zoster pain':ab,ti）  #4. ('fmri' OR 'functional magnetic resonance imaging' OR 'mri' OR 'magnetic resonance imaging' OR 'vbm' OR 'voxel-based morphometry' OR 'sbm' OR 'surface-based morphometry' OR 'source-based morphometry' OR 'asl' OR 'arterial spin labeling' OR 'rs-fmri' OR 'resting-state fmri' OR 'functional connectivity' OR 'task-fmri' OR 'alff' OR 'amplitude of low-frequency fluctuation' OR 'falff' OR 'fractional amplitude of low-frequency fluctuation' OR 'reho' OR 'regional homogeneity' OR 'dti' OR 'diffusion tensor imaging' OR 'neuroimaging' OR 'brain morphometry' OR 'structural connectivity' OR 'wmv' OR 'white matter' OR 'gmv' OR 'gray matter volume' OR 'spect' OR 'single-photon emission computed tomography' OR 'pet' OR 'positron emission tomography' OR 'mrs' OR 'magnetic resonance spectroscopy' OR 'nirs' OR 'near-infrared spectroscopy')  #2 AND #4  #3 AND #4 | |
| **CNKI** | <https://www.cnki.net/> |
| 1. TKA=(postherpetic neuralgia OR PHN OR herpes zoster neuralgia OR zoster-associated pain OR herpes zoster pain OR post-shingles pain) AND FT=(fMRI OR functional magnetic resonance imaging OR MRI OR magnetic resonance imaging OR VBM OR voxel-based morphometry OR SBM OR surface-based morphometry OR source-based morphometry OR ASL OR arterial spin labeling OR rs-fMRI OR resting-state fMRI OR functional connectivity OR task-fMRI OR ALFF OR amplitude of low-frequency fluctuation OR fALFF OR fractional amplitude of low-frequency fluctuation OR ReHo OR regional homogeneity OR DTI OR diffusion tensor imaging OR neuroimaging OR brain morphometry OR structural connectivity OR WMV OR white matter OR GMV OR gray matter volume OR SPECT OR single-photon emission computed tomography OR PET OR positron emission tomography OR MRS OR magnetic resonance spectroscopy OR NIRS OR near-infrared spectroscopy)  2. SU=(postherpetic neuralgia OR PHN OR herpes zoster neuralgia OR zoster-associated pain OR herpes zoster pain OR post-shingles pain) AND FT=(fMRI OR functional magnetic resonance imaging OR MRI OR magnetic resonance imaging OR VBM OR voxel-based morphometry OR SBM OR surface-based morphometry OR source-based morphometry OR ASL OR arterial spin labeling OR rs-fMRI OR resting-state fMRI OR functional connectivity OR task-fMRI OR ALFF OR amplitude of low-frequency fluctuation OR fALFF OR fractional amplitude of low-frequency fluctuation OR ReHo OR regional homogeneity OR DTI OR diffusion tensor imaging OR neuroimaging OR brain morphometry OR structural connectivity OR WMV OR white matter OR GMV OR gray matter volume OR SPECT OR single-photon emission computed tomography OR PET OR positron emission tomography OR MRS OR magnetic resonance spectroscopy OR NIRS OR near-infrared spectroscopy)  3. TI=(postherpetic neuralgia OR PHN OR herpes zoster neuralgia OR zoster-associated pain OR herpes zoster pain OR post-shingles pain) AND FT=(fMRI OR functional magnetic resonance imaging OR MRI OR magnetic resonance imaging OR VBM OR voxel-based morphometry OR SBM OR surface-based morphometry OR source-based morphometry OR ASL OR arterial spin labeling OR rs-fMRI OR resting-state fMRI OR functional connectivity OR task-fMRI OR ALFF OR amplitude of low-frequency fluctuation OR fALFF OR fractional amplitude of low-frequency fluctuation OR ReHo OR regional homogeneity OR DTI OR diffusion tensor imaging OR neuroimaging OR brain morphometry OR structural connectivity OR WMV OR white matter OR GMV OR gray matter volume OR SPECT OR single-photon emission computed tomography OR PET OR positron emission tomography OR MRS OR magnetic resonance spectroscopy OR NIRS OR near-infrared spectroscopy)  4. AB=(postherpetic neuralgia OR PHN OR herpes zoster neuralgia OR zoster-associated pain OR herpes zoster pain OR post-shingles pain) AND FT=(fMRI OR functional magnetic resonance imaging OR MRI OR magnetic resonance imaging OR VBM OR voxel-based morphometry OR SBM OR surface-based morphometry OR source-based morphometry OR ASL OR arterial spin labeling OR rs-fMRI OR resting-state fMRI OR functional connectivity OR task-fMRI OR ALFF OR amplitude of low-frequency fluctuation OR fALFF OR fractional amplitude of low-frequency fluctuation OR ReHo OR regional homogeneity OR DTI OR diffusion tensor imaging OR neuroimaging OR brain morphometry OR structural connectivity OR WMV OR white matter OR GMV OR gray matter volume OR SPECT OR single-photon emission computed tomography OR PET OR positron emission tomography OR MRS OR magnetic resonance spectroscopy OR NIRS OR near-infrared spectroscopy) | |
| **Wanfang Data** | <https://www.wanfangdata.com.cn/> |
| #1. Topic:(postherpetic neuralgia OR PHN OR herpes zoster neuralgia OR zoster-associated pain OR herpes zoster pain OR post-shingles pain) and All:(fMRI OR functional magnetic resonance imaging OR MRI OR magnetic resonance imaging OR VBM OR voxel-based morphometry OR SBM OR surface-based morphometry OR source-based morphometry OR ASL OR arterial spin labeling OR rs-fMRI OR resting-state fMRI OR functional connectivity OR task-fMRI OR ALFF OR amplitude of low-frequency fluctuation OR fALFF OR fractional amplitude of low-frequency fluctuation OR ReHo OR regional homogeneity OR DTI OR diffusion tensor imaging OR neuroimaging OR brain morphometry OR structural connectivity OR GMV OR gray matter volume OR SPECT OR single-photon emission computed tomography OR PET OR positron emission tomography OR MRS)  #2.Topic:(postherpetic neuralgia OR PHN OR herpes zoster neuralgia OR zoster-associated pain OR herpes zoster pain OR post-shingles pain) and All:(WMV OR White matter OR magnetic resonance spectroscopy OR NIRS OR near-infrared spectroscopy)  #3. Title or Keywords:(postherpetic neuralgia OR PHN OR herpes zoster neuralgia OR zoster-associated pain OR herpes zoster pain OR post-shingles pain) and All:(fMRI OR functional magnetic resonance imaging OR MRI OR magnetic resonance imaging OR VBM OR voxel-based morphometry OR SBM OR surface-based morphometry OR source-based morphometry OR ASL OR arterial spin labeling OR rs-fMRI OR resting-state fMRI OR functional connectivity OR task-fMRI OR ALFF OR amplitude of low-frequency fluctuation OR fALFF OR fractional amplitude of low-frequency fluctuation OR ReHo OR regional homogeneity OR DTI OR diffusion tensor imaging OR neuroimaging OR brain morphometry OR structural connectivity OR GMV OR gray matter volume OR SPECT OR single-photon emission computed tomography OR PET OR positron emission tomography)  #4. Title or Keywords:(postherpetic neuralgia OR PHN OR herpes zoster neuralgia OR zoster-associated pain OR herpes zoster pain OR post-shingles pain) and All:(MRS OR WMV OR White matter OR magnetic resonance spectroscopy OR NIRS OR near-infrared spectroscopy) | |

## **2.2** Data Extraction

### **Supplementary Table 3.** Demographic, clinical, and imaging characteristics of studies included in the functional rs-fMRI and structural VBM meta-analyses.

| Study | Year | PHN (female),n | Mean age ±SD,year | Education years | Pain Duration | VAS Scores | Healthy (female),n | Mean age ±SD,year | Education year | Hand | Scanner | Time (s) | Software | Slice Thickness (mm) | FWHM (mm) | Coordinate | Methodology | Threshold | *P*-value |
| --- | --- | --- | --- | --- | --- | --- | --- | --- | --- | --- | --- | --- | --- | --- | --- | --- | --- | --- | --- |
| PHN vs HC |  |  |  |  |  |  |  |  |  |  |  |  |  |  |  |  |  |  |  |
| Functional |  |  |  |  |  |  |  |  |  |  |  |  |  |  |  |  |  |  |  |
| **ALFF/fALFF/ReHo** | | |  |  |  |  |  |  |  |  |  |  |  |  |  |  |  |  |  |
| Cao 9 | 2019 | 23(12) | 71.26±8.43 | 8.39±3.62 | 3.83±7.26 | 6.83±0.98 | 23(15) | 69.78±9.05 | 9.78±3.45 | Right | 3.0T | 420s | SPM8 | 3.5 | 4 | MNI | ALFF | GRF corrected | *P*＜0.01 |
| Zhang 10 | 2016 | 17(8) | 64.82±7.03 | 5.53±4.17 | 5.12±6.17 | 6.53±1.46 | 17(10) | 60.88±6.47 | 5.94±3.53 | Right | 3.0T | 824s | DPARSF | 4 | 8 | MNI | fALFF, ReHo | AlphaSim corrected | *P*＜0.05 |
| Yin 11 | 2017 | 15(5) | 61.53±13.25 | 9.12±3.0 | 6.60±NA | NA | 15(5) | 55.73±8.31 | 11.48±2.30 | Right | 3.0T | 486s | DPARSF,SPM12 | 4 | 6 | MNI | fALFF, ReHo | AlphaSim corrected | *P*＜0.001 |
| Liao et al 12 | 2015 | 8(4) | 60.00 ±7.01 | NA | 10.75±5.52 | 5.88±0.99 | 8(4) | 61.15±6.54 | NA | Right | 3.0T | 480s | SPM8 | 3.5 | 6 | MNI | ALFF | AlphaSim corrected | *P*voxel＜0.001, *P*cluster＜0.05 |
| Jiang 13 | 2017 | 12(5) | 60.92±9.29 | 8.87±3.45 | NA | NA | 12(5) | 61.75±8.82 | 9.26±5.53 | Right | 3.0T | 480s | DPARSF,SPM8 | 4 | 4 | MNI | ALFF, fALFF | AlphaSim corrected | *P*voxel＜0.001, *P*cluster＜0.05 |
| Bai et al 14 | 2022 | 34(NA) | 65.61±5.49 | NA | NA | NA | 40(NA) | 64.45±3.48 | NA | Right | 3.0T | 480s | SPM8 | 4 | NA | MNI | ALFF | AlphaSim corrected | *P*voxel＜0.001,*P*cluster＜0.05 |
| Cao 15 | 2017 | 18(9) | 64.30±6.40 | NA | 13.60±19.60 | 6.30±1.10 | 20(12) | 60.30±5.80 | NA | Right | 3.0T | 420s | DPARSF,REST | 5 | 4 | MNI | fALFF, ReHo | AlphaSim corrected | *P*cluster＜0.05 |
| Huang et al16 | 2020 | 24(9) | 67.00±14.10 | NA | 7.57 ± 2.40 | 6.70±1.60 | 20(13) | 63.10±12.20 | NA | Right | 3.0T | 438s | DPARSF | 3.6 | 6 | MNI | ALFF | FDR corrected | *P*＜0.05 |
| Cao et al 17 | 2017 | 19(8) | 64.40±2.10 | NA | 5.40±1.30 | 6.30±0.40 | 19(11) | 61.40±1.10 | NA | Right | 3.0T | 420s | DPARSF | 4 | 4 | MNI | fALFF, ReHo | AlphaSim corrected | *P*voxel＜0.05 |
| Gu et al 18 | 2019 | 18(7) | 59.67±8.41 | NA | 3.89±0.87 | 6.61±1.47 | 18(7) | 59.27±7.74 | NA | Right | 3.0T | 480s | DPABI | 4 | 4 | MNI | ALFF | GRF corrected | *P*voxel＜0.025, *P*cluster＜0.05 |
| Hui et al 19 | 2020 | 12(5) | 60.92 ± 9.29 | 8.87±3.45 | NA | NA | 12(5) | 61.75± 8.82 | 9.26±5.53 | Right | 3.0T | 480s | DPABI, SPM8 | 4 | 6 | MNI | ALFF, fALFF | AlphaSim corrected | *P*＜0.05 |
| Cao et al 20 | 2017 | 23(13) | 65.90 ± 2.30 | NA | 12.20 ± 3.70 | 6.70±0.30 | 55(24) | 63.1 ± 0.79 | NA | Right | 3.0T | 420s | DPARSF | 4 | 4 | MNI | fALFF,ReHo | AlphaSim corrected | *P*voxel＜0.05 |
| Structural |  |  |  |  |  |  |  |  |  |  |  |  |  |  |  |  |  |  |  |
| **VBM** |  |  |  |  |  |  |  |  |  |  |  |  |  |  |  |  |  |  |  |
| Zhang 10 | 2016 | 17(8) | 64.82±7.03 | 5.53±4.17 | 5.12±6.17 | 6.53±1.46 | 17(10) | 60.88±6.47 | 5.94±3.53 | Right | 3.0T | 824s | SPM8 | 1 | 8 | MNI | VBM | uncorrected | *P*＜0.001 |
| Jiang 13 | 2017 | 12(5) | 60.92±9.29 | 8.87±3.45 | NA | NA | 12(5) | 61.75±8.82 | 9.26±5.53 | Right | 3.0T | 312s | SPM8 | 1 | 4 | MNI | VBM | AlphaSim corrected | *P*voxel＜0.001, *P*cluster＜0.05 |
| Wang et al 21 | 2017 | 17(6) | 62.53± 12.79 | 6.53±1.81 | 4.15± 2.64 | 6.74±0.59 | 17(8) | 54.65±11.96 | 6.82± 1.42 | Right | 3.0T | 696s | DPARSF | 1 | 8 | MNI | VBM | FDR corrected | *P*＜0.05 |
| Yu et al 22 | 2021 | 28(11) | 63.07±7.90 | NA | 2.50±1.35 | 6.68±1.63 | 21(9) | 58.48±10.34 | NA | Right | 3.0T | 546s | SPM8 | 1 | 8 | MNI | VBM | AlphaSim corrected | Pvoxel＜0.01, *P*cluster＜0.05 |
| Liu et al 23 | 2019 | 22(13) | 65.50±11.25 | NA | 2.00±2.25 | 6.50±1.00 | 28(19) | 54.00±9.75 | NA | Right | 3.0T | 480s | DPARSF | 1 | 8 | MNI | VBM | GRF corrected | *P*voxel＜0.01, *P*cluster＜0.05 |
| Li et al 24 | 2022 | 25(12) | 63.00 ± 7.51 | 4.88±2.18 | 5.12 ± 6.17 | 6.53±1.46 | 25(15) | 61.68± 8.09 | 5.72± 2.01 | Right | 3.0T | NA | SPM8 | NA | NA | MNI | VBM | uncorrected | *P*＜0.001 |

Continues……

| Study | Year | PHN (female),n | Mean age ±SD,year | Education years | Pain Duration | VAS Scores | HZ (female),n | Mean age ±SD,year | Education year | Pain Duration | VAS Scores | Hand | Scanner | Time | Software | Slice Thickness（mm） | FWHM (mm) | Coordinate | Methodology | Threshold | *P*-value |
| --- | --- | --- | --- | --- | --- | --- | --- | --- | --- | --- | --- | --- | --- | --- | --- | --- | --- | --- | --- | --- | --- |
| PHN vs HZ | |  |  |  |  |  |  |  |  |  |  |  |  |  |  |  |  |  |  |  |  |
| Functional | |  |  |  |  |  |  |  |  |  |  |  |  |  |  |  |  |  |  |  |  |
| **ALFF/fALFF/ReHo** | | |  |  |  |  |  |  |  |  |  |  |  |  |  |  |  |  |  |  |  |
| Cao 15 | 2017 | 18(9) | 64.30±6.40 | NA | 13.60±19.60 | 6.30±1.10 | 32(13) | 60.80±6.00 | NA | 0.90±0.60 | 6.94±1.40 | Right | 3.0T | 420s | DPARSF,REST | 5 | 4 | MNI | fALFF, ReHo | AlphaSim corrected | *P*cluster＜0.05 |
| Liang 25 | 2013 | 6(3) | 58.33±4.03 | NA | 4.00±1.67 | 6.33±1.32 | 6(4) | 59.17±3.12 | NA | 0.38±0.04 | 7.41±1.88 | Right | 3.0T | 420s | SPM 8, REST | 4 | 4 | MNI | ALFF, fALFF | uncorrected | *P*uncorrected＜0.05 |
| Cao et al 20 | 2017 | 23(13) | 65.90±2.30 | NA | 12.20±3.70 | 6.70±0.30 | 50(21) | 60.50±1.80 | NA | 0.98±0.10 | 6.80±0.20 | Right | 3.0T | 420s | DPARSF,SPM8, REST | 4 | 4 | MNI | fALFF、ReHo | AlphaSim corrected | *P*voxel＜0.05 |
| Liang et al 26 | 2014 | 6(3) | 58.33±4.03 | NA | 4.00±1.67 | 6.33±1.32 | 6(4) | 59.17±3.12 | NA | 0.38±0.04 | 7.41±1.88 | Right | 3.0T | 420s | SPM8, REST | 4 | 4 | MNI | ReHo | uncorrected | *P*＜0.05 |
| Structural |  |  |  |  |  |  |  |  |  |  |  |  |  |  |  |  |  |  |  |  |  |
| **VBM** |  |  |  |  |  |  |  |  |  |  |  |  |  |  |  |  |  |  |  |  |  |
| Cao 15 | 2017 | 18(9) | 64.30±6.40 | NA | 13.6±19.6 | 6.30±1.10 | 32(13) | 60.80±6.00 | NA | 0.90±0.60 | 6.94±1.40 | Right | 3.0T | 628s | DPARSF,SPM 8 | 1 | 8 | MNI | fALFF, ReHo | AlphaSim corrected | *P*cluster＜0.05 |
| Yu et al 22 | 2021 | 28(11) | 63.07±7.90 | NA | 2.50±1.35 | 6.68±1.63 | 25(11) | 59.00±9.84 | NA | 0.44±0.25 | 6.98±1.43 | Right | 3.0T | 546s | SPM 8 | 1 | 8 | MNI | VBM | AlphaSim corrected | *P*voxel＜0.01, *P*cluster＜0.05 |
| Liu et al 23 | 2019 | 22(13) | 65.50±11.25 | NA | 2.00±2.25 | 6.50±1.00 | 33(20) | 57.00±12.50 | NA | 0.30±0.38 | 6.00±2.00 | Right | 3.0T | 480s | DPARSF | 1 | 8 | MNI | VBM | GRF corrected | *P*voxel＜0.01, *P*cluster＜0.05 |

Continues……

| Study | Year | PHN (female),n | Mean Age ±SD,year | Education years | Pain Duration | Treatment Duration | Treatment | Clinical Assessment Scales | Hand | Scanner | Time | Software | Slice Thickness (mm) | FWHM (mm) | Coordinate | Methodology | Threshold | *P*-value |
| --- | --- | --- | --- | --- | --- | --- | --- | --- | --- | --- | --- | --- | --- | --- | --- | --- | --- | --- |
| PHN Pre- and Post-Treatment | | |  |  |  |  |  |  |  |  |  |  |  |  |  |  |  |  |
| Functional |  |  |  |  |  |  |  |  |  |  |  |  |  |  |  |  |  |  |
| **ALFF/fALFF/ReHo** | | |  |  |  |  |  |  |  |  |  |  |  |  |  |  |  |  |
| Jiang 13 | 2017 | 12(5) | 60.92±9.29 | 8.87±3.45 | NA | NA | NA | NA | Right | 3.0T | 480s | DPARSF, SPM 8 | 4 | 4 | MNI | ALFF, fALFF | AlphaSim corrected | *P*voxel＜0.001, *P*cluster＜0.05 |
| Chun et al 27 | 2023 | 10(5) | 69.50±13.80 | NA | 3.25±2.35 | 0.5 | stSCS | NA | Right | 3.0T | 412s | DPARSF, SPM 8 | 2.2 | 6 | MNI | ALFF | GRF corrected | *P*voxel＜0.001, *P*cluster＜0.05 |
| Zhang et al 28 | 2020 | 15(8) | 64.13±7.33 | NA | 3.57±2.27 | 6 | NA | Pre:7.1±1.2; Post:0.7±0.8 | Right | 3.0T | 420s | DPARSF, SPM 8 | 4 | 4 | MNI | fALFF,ReHo | AlphaSim corrected | *P*voxel＜0.05 |
| Fan et al 29 | 2022 | 10(5) | 69.50±13.80 | NA | 3.25±2.35 | 0.5 | stSCS | NA | Right | 3.0T | 412s | DPARSF, SPM 8 | 2.2 | 4 | MNI | ReHo | GRF corrected | *P*voxel＜0.005, *P*cluster＜0.05 |

Abbreviation: **ALFF**: amplitude of low-frequency fluctuations; **AlphaSim corrected**: Monte Carlo simulation-based multiple comparison correction method; **DPARSF**: Data Processing Assistant for Resting-State fMRI; **DPABI**: Data Processing and Analysis for Brain Imaging; **fALFF**: Fractional Amplitude of Low-Frequency Fluctuations; **FDR corrected**: False Discovery Rate corrected; **FWHM**: full width at half maximum; **GRF corrected**: Gaussian Random Field corrected; **ReHo**: regional homogeneity; **REST**: Resting-State fMRI Data Analysis Toolkit; **VBM**: Voxel-Based Morphometry; **SPM**: Statistical Parametric Mapping.

## **2.3** Neuroimaging data synthesis and coding

### **Supplementary Table 4.** Data of the peak coordinates, effect size and their original studies

| **PHN vs HC** | | | |
| --- | --- | --- | --- |
| **Functional(ALFF/fALFF)** | | | |
| **Record Number** | **Study** | **File name** | **Coordinate information (x,y,z,t-value)** |
| *2 | Cao9 | ACaoWanYu.spm_mni | 25,-22,-7,3.96  -27,-11,-30,2.74  16,-17,4,3.29  -8,-7,4,3.83  20,7,10,4.4  -30,-18,4,2.79  -25,-10,-35,3.93  -38,-12-38,2.96 |
| CaoWanYu.Postherpetic neuralgia in chest and back patients with emotion disorders:A resting state low frequency amplitude study [D].Chinese Medical Sciences University,2019.DOI:10.27652/d.cnki.gzyku.2019.001021. | | | |
| *12 | Zhang10 | BZhangYi.spm_mni | 15,-45,-21,3.78  13,-74,20,4.46  -33,-12,-5,3.73  -27,48,11,-4.29  36,54,15,-5.31  -15,63,18,-4.82  -42,44,6,-4.05  -38,41,-13,-3.58 |
| ZhangYi.Multimodal MRI-based study on patients with postherpetic neuralgia[D].Shanghai Jiao Tong University,2016. DOI:10.27307/d.cnki.gsjtu.2016.003364. | | | |
| *13 | Yin11 | CYinRuJiao.spm_mni | -6,-33,-33,5.13  -6,-33,-33,5.34  -14,-16,31,5.54  -11,18,31,5.14  -21,0,29,5.2  -30,12,-9,5.17  -21,-27,1,5.21  21,-4,-1,5.16  -1,-32,-19,5.24  6,-33,-57,4.94  31,-11,-17,5.22  -51,0,-12,5.32  -19,-1,6,5.24  -21,-31,52,5.12  33,-31,-2,5.29  -21,-31,35,5.24  -27,-21,-7,5.21  -9,41,28,5.23  -25,-11,41,5.12  -21,-30,-51,6.54  -21,-30,51,6.34  -12,-11,28,6.69  13,-12,11,6.54  -42,-6,-24,6.13  -9,-12,-15,6.11  21,21,-29,6.14  26,21,-5,6.15  21,-15,6,6.31  -9,48,39,-4.79  -22,-15,34,-4.16  -5,12,-32,-4.32  8,-22,-17,-4.45  33,48,-15,-4.06  45,23,0,-4.31  48,-39,-9,-4.17  -36,0,61,-4.49  60,-3,24,-4.2 |
| YinRuJiao,Resting-state functional Magnetic Resonance Imaging study of the Brain in Patients with postherpetic neuralgia [D],Kunming Medical University,2017. | | | |
| *17 | Liao et al12 | DLiaoXiang.spm_mni | 27,-69,-18,7.39  24,36,-15,6.87  45,27,-9,14.02  -48,36,12,6.7  -30,-45,45,9.79  21,-93,-12,10.7  63,-27,-18,-8.64  -9,-99,-15,-8.13  6,-39,-9,-6.6  -15,-54,3,-7.66  54,-9,51,-10.82  24,-81,-39,5.62  15,27,-3,13.6  -54,12,-12,8.94  18,-93,33,9.79  6,-81,-12,8.33  -18,-27,-9,-6.68  6,-54,-33,-6.14  -6,3,48,-7.3  57,-6,6,-10.23  -57,6,3,-8.38  57,-42,24,-8.27 |
| LiaoXiang, ChenFuYong, TaoWei,et al. Functional magnetic resonance imaging study on the changes of basic brain activity in patients with postherpetic neuralgia [J]. Advances in Biochemistry and Biophysics,2015,42(10):947-954.DOI:10.16476/j.pibb.2015.0095. | | | |
| *22 | Jiang13 | EJiangChengCheng.spm_mni | -9,-30,-45,4.0465  42,-18,3,3.4013  -48,9,-6,3.5269  12,15,33,4.6225  12,-57,51,5.7298  -39,-27,15,4.1316  42,-39,-21,-4.622  21,-15,42,-4.4647  9,51,-24,-5.8557  -42,-36,-9,-3.8514  -15,-9,60,-3.9412  9,-66,-18,3.7405  12,24,-30,4.4287  24,-66,51,3.0217  -12,24,-17,3.7658  -27,-57,66,3.9027  15,45,-6,-4.3253  33,18,42,-4.7832  6,-60,48,-4.1152  -15,18,60,-4.4107 |
| Jiang ChengCheng,The research of postherpetic neuralgia patients with resting state functional MRI and voxel based morphometry [D]. Suzhou University,2017. | | | |
| *24 | Bai et al14 | FBoLaLa.spm_mni | -10,-33,-42,4.091  43,-8,7,3.882  -48,13,9,3.906  13,16,36,4.116  12,18,34,4.382  10,20,35,3.736  13,-48,45,3.362  -16,-21,18,-4.401  37,-18,21,-4.918  44,33,28,-4.709  -51,32,28,-3.902  49,21,18,-4.72  42,-39,-20,-3.118  40,-37,-23,-4.264 |
| BoLaLa, YangWei, ZhouMiao, et al ,Magnetic Resonance Imaging Study of Brain Function and Structure Changes in Patients with Post-herpetic Neuralgia[J]. Imaging Science and Photochemistry,2022,40(02):286-290. | | | |
| *32 | Cao15 | GCaoSong.spm_mni | 18,-78,-39,4.39  -15,-54,-54,4.25  -42,-21,-42,4.24  21,-9,9,4.62  -21,-9,0,3.64  66,-42,6,4.7  -30,-93,27,4.34  42,-78,30,4.88  -24,-21,45,3.99  9,-21,66,3.95  69,-27,18,-4.37  -24,-57,12,-38  3,45,15,-3.81  27,-39,24,-4.17  33,-63,45,-4.93 |
| CaoSong,Multimodal MRI study on the herpes zoster pain and postherpetic neuralgia [D]. Shanghai Jiao Tong University,2017. DOI:10.27307/d.cnki.gsjtu.2017.000849. | | | |
| 5 | Huang et al16 | HJiabinHuang.spm_mni | 9,-57,24,4.92  -3,-63,27,4.89  -6,-48,27,5.46  66,-6,-27,5.38  69,-36,-12,4.67  54,-51,36,4.62  9,-48,24,5.8  -6,-48,27,5.76  0,-63,27,4.83  42,48,27,4.66  63,-6,-27,4.53 |
| Huang J, Li Y, Xie H, Yang S, Jiang C, Sun W, Li D, Liao Y, Ba X, Xiao L. Abnormal Intrinsic Brain Activity and Neuroimaging-Based fMRI Classification in Patients With Herpes Zoster and Postherpetic Neuralgia. Front Neurol. 2020 Oct 22;11:532110. | | | |
| 6 | Cao et al17 | ISongCao.spm_mni | 21,-66,-60,3.56  12,-9,-30,3.54  15,-45,-21,3.78  30,-18,3,4.2  -33,-12,-6,3.73  21,-72,18,5.35  36,-12,54,3.78  36,54,15,-5.31  -30,-69,42,-3.55  30,36,39,-4.15  -24,36,54,-3.68 |
| Cao S, Song G, Zhang Y, Xie P, Tu Y, Li Y, Yu T, Yu B. Abnormal Local Brain Activity Beyond the Pain Matrix in Postherpetic Neuralgia Patients: A Resting-State Functional MRI Study. Pain Physician. 2017 Feb;20(2):E303-E314. | | | |
| 16 | Gu et al18 | JLiLiGu.spm_mni | 30,57,0,–3.426  21,33,39,3.492  –6,24,–33,5.744  –15,60,27,5.35  18,63,42,4.781  42,33,33,–4.840  3,93,9,–4.809  –27,9,69,–4.455  –27,57,15,–5.222 |
| Gu L, Hong S, Jiang J, Liu J, Cao X, Huang Q, Zeng X, Zhou F, Zhang D. Bidirectional alterations in ALFF across slow-5 and slow-4 frequencies in the brains of postherpetic neuralgia patients. J Pain Res. 2018 Dec 18;12:39-47. doi: 10.2147/JPR.S179077. | | | |
| 22 | Hui et al19 | KHuiDai.spm_mni | 9,-30,-45,-4.0111  42,0,9,-4.8418  -48,-21,-3,-3.3541  -12,45,-6,-3.6621  21,-45,18,-4.0819  -12,15,33,-4.1658  -12,-57,51,-5.62  -42,-39,-21,4.2719  63,-3,-30,4.3931  -9,51,-24,5.7819  -45,-72,-21,3.8813  24,-63,69,4.57  -15,-30,75,3.7825  -15,45,-6,-4.7132  15,18,60,-4.4553  -6,-69,-15,3.8436  -12,24,-30,4.7796  21,-63,51,4.1911 |
| Dai H, Jiang C, Wu G, Huang R, Jin X, Zhang Z, Wang L, Li Y. A combined DTI and resting state functional MRI study in patients with postherpetic neuralgia. Jpn J Radiol. 2020 May;38(5):440-450. | | | |
| 35 | Cao et al20 | LSongCao.spm_mni | -27,-57,-48,5.26  30,-9,-42,4.81  -51,-9,-33,4.91  -33,-18,3,5.55  21,-15,3,6.39  -48,-75,21,3.86  3,-72,39,4.35  -18,-9,42,4.81  24,-48,12,-4.76  3,-81,-6,-3.58  -21,-60,6,-5.22  -45,18,-12,-4.12  3,57,15,-5.07  3,-18,27,-4.05  15,27,66,-4.83 |
| Cao S, Li Y, Deng W, Qin B, Zhang Y, Xie P, Yuan J, Yu B, Yu T. Local Brain Activity Differences Between Herpes Zoster and Postherpetic Neuralgia Patients: A Resting-State Functional MRI Study. Pain Physician. 2017 Jul;20(5):E687-E699. | | | |
| Functional(ReHo) | | | |
| *12 | Zhang10 | MZhangYi.spm_mni | -13,-8,5,3.000  15,-5,7,3.780  12,-75,21,4.100  -30,24,39,4.250  -33,-12,69,3.380  15,-17,-30,3.710  -36,-60,-45,-3.844  54,-3,-24,-3.688  -63,-21,-9,-5.323 |
| ZhangYi. Multimodal MRI-based study on patients with postherpetic neuralgia [D]. Shanghai Jiao Tong University,2016.DOI:10.27307/d.cnki.gsjtu.2016.003364. | | | |
| *13 | Yin11 | NYinRuJiao.spm_mni | -30,12,-9,6.97  32,-3,27,5.15  23,-41,0,5.22  -21,30,7,5.65  30,-9,42,5.87  -42,-42,6,6.69  -9,-3,48,5.4  -30,-9,42,6.65  20,-12,18,4.16  21,23,-16,4.11  22,-41,24,5.17  -10,-12,31,5.12  54,33,9,5.24  -10,-12,31,5.12  34,7,-16,5.75  -42,-42,6,5.29  -4,-11,-52,6.69  12,0,48,5.31  -31,-33,12,5.57  -31,-33,12,5.57  -14,19,23,4.43  -37,-12,33,5.23  23,16,-12,4.1  13,31,-19,-5.89  3,-26,0,-5.89  3,36,-9,-5.89  3,36,-9,-5.89  24,-45,6,-4.65  45,-42,15,-5.95  -18,-69,21,-5.69  -31,42,-41,-5.89  51,6,30,-5.28 |
| YinRuJiao,Resting-state functional Magnetic Resonance Imaging study of the Brain in Patients with postherpetic neuralgia [D],Kunming Medical University,2017. | | | |
| *32 | Cao15 | OCaoSong.spm_mni | -12,-54,-54,4.88  -15,-93,-42,3.15  -18,-21,9,2.87  15,-3,6,3.73  63,-45,6,3.19  9,12,39,3.7  -21,36,36,3.35  -33,-9,54,2.96  3,-27,13,3.08  36,-9,-33,-4.02  48,-33,-27,-5.17  -57,-48,-6,-5.89  3,27,-18,-2.71  21,-93,12,-4.23  42,-42,39,-3.94  -57,-30,45,-3.93 |
| CaoSong,Multimodal MRI study on the herpes zoster pain and postherpetic neuralgia [D]. Shanghai Jiao Tong University,2017. DOI:10.27307/d.cnki.gsjtu.2017.000849. | | | |
| 6 | Cao et al17 | PSongCao.spm_mni | 18,-63,-51,2.86  12,-21,-30,3.9  -21,-12,6,3.4  12,-51,-15,3.51  15,-6,6,3.78  27,36,-3,2.93  -36,-87,21,2.92  12,-75,21,4.1  15,3,45,3.37  -30,24,39,4.25  -36,-60,-45,-3.84  51,-33,-30,-4.68  54,-3,24,-3.69  -39,-42,-9,-3.11  -21,-36,-9,-3.58  -63,-21,-9,-5.32  -51,-21,21,-3.6  57,-15,18,-3.1  54,-6,42,-4.22  -36,-57,60,-3.2 |
| Cao S, Song G, Zhang Y, Xie P, Tu Y, Li Y, Yu T, Yu B. Abnormal Local Brain Activity Beyond the Pain Matrix in Postherpetic Neuralgia Patients: A Resting-State Functional MRI Study. Pain Physician. 2017 Feb;20(2):E303-E314. | | | |
| 35 | Cao et al20 | QSongCao.spm_mni | -12,-39,-33,5.15  -42,-78,-48,2.83  39,12,-33,3.49  21,27,-15,3.27  -12,30,39,6.09  3,-69,33,3.31  -42,-87,27,3.4  -24,-48,18,-5.22  -48,-39,-33,-6.73  -57,-33,48,-5.54  0,-9,48,-3.41 |
| Cao S, Li Y, Deng W, Qin B, Zhang Y, Xie P, Yuan J, Yu B, Yu T. Local Brain Activity Differences Between Herpes Zoster and Postherpetic Neuralgia Patients: A Resting-State Functional MRI Study. Pain Physician. 2017 Jul;20(5):E687-E699. | | | |
| **Structural(VBM)** | | | |
| *12 | Zhang10 | RZhangYi.spm_mni | -27,-36,-27,-4.34  15,-3,-18,-4.24  25,4,10,-4.2  10,17,5,-4.23  -39,-24,12,-4.22  39,10,42,-4.49  54,-6,45,-4.6  0,-39,33,-4.25  -39,-24,42,-5.082  40,-29,42,-4.56 |
| ZhangYi. Multimodal MRI-based study on patients with postherpetic neuralgia [D]. Shanghai Jiao Tong University,2016. DOI:10.27307/d.cnki.gsjtu.2016.003364. | | | |
| *22 | Jiang13 | SJiangChengCheng.spm_mni | -25,-43,-45,3.9986  -29,-3,-45,3.3849  -29,-3,-45,3.3849  37,-81,-32,2.4633  36,2,-47,3.6017  36,2,-47,3.6017  -3,-38,-46,-2.581  2,-29,-29,-2.426  -3,-38,-46,-2.581  2,-29,-29,-2.426  -47,-11,-3,-2.2902  -37,-10,45,-2.4563  -37,-10,45,-2.4563  33,20,44,-2.2299  33,20,44,-2.2299 |
| Jiang ChengCheng,The research of postherpetic neuralgia patients with resting state functional MRI and voxel based morphometry [D]. Suzhou University,2017. | | | |
| *37 | Wang et al21 | TWangSiDan.spm_mni | 0,21,-27,-11.111  -42,18,-9,-7.1246  -30,6,9,-4.719  22,-7,-11,-7.124  3,-24,27,-7.925  -6,-87,42,-5.597  -6,12,9,-8.988  15,-3,-48,-8.348  -12,-93,-36,-7.823  33,-90,-36,-12.687  -48,-42,-45,-7.329  -27,-12,42,10.0424  24,27,30,8.7437  -27,-12 42,9.375  3,-46,-6,6.6842  15,-39,-39,12.9612 |
| Wang S, LU Y, Zhao W, et al. Observation of morphological changes of brain gray matter volume in patients with postherpetic neuralgia using VBM-DARTEL method[J]. Journal of Practical Radiology, 2017: 1337-1340, 1356. | | | |
| 12 | Yu et al22 | UYuTang.spm_mni | -9,9,-9,-4.8363  21,9,-9,-3.4183 |
| Tang Y, Ren C, Wang M, Dai G, Xiao Y, Wang S, Han F, Chen G. Altered gray matter volume and functional connectivity in patients with herpes zoster and postherpetic neuralgia. Brain Res. 2021 Oct 15;1769:147608. doi: 10.1016/j.brainres.2021.147608. Epub 2021 Jul 31. | | | |
| 13 | Liu et al23 | VJiaQiLiu.spm_mni | –46.5,–25.5,13.5,–4.599  36,51,20.5,–4.034  36,–19.5,18,–6.278  –55.5,-6,27,–4.835  46.5,–13.5,40.5,–4.385  –37.5,–33,40.5,–4.080  –22.5,–33,–46.5,4.106  16.5,-6,–28.5,5.005  24,1.5,–1.5,5.587 |
| Liu J, Gu L, Huang Q, Hong S, Zeng X, Zhang D, Zhou F, Jiang J. Altered gray matter volume in patients with herpes zoster and postherpetic neuralgia. J Pain Res. 2019 Feb 7;12:605-616. doi: 10.2147/JPR.S183561. | | | |
| 20 | Li et al24 | WLiNiu.spm_mni | -27,-36,-27,-4.34  15,-3,-18,-4.24  25,4,10,-4.2  10,17,5,-4.23  -39,-24,12,-4.22  39,10,42,-4.49  54,-6,45,-4.6  0,-39,33,-4.25  -39,-24,42,-5.082  40,-29,42,-4.56 |
| Niu L, Hu Y, Yuan C D, et al. Cerebral structural alterations in the patients undergoing postherpetic neuralgia: A VBM–MRI study[J]. ibrain, 2022, 8(2): 119-126. | | | |
| **PHN vs HZ** | | | |
| **Functional（ALFF/fALFF/ReHo）** | | | |
| *32 | Cao15 | GGCaoSong.spm_mni | -36,-81,-42,4.93  33,-72,-39,4.84  60,-12,-27,4.3  -27,-15,-42,4.53  -48,-45,-21,4.42  -18,-12,42,3.7  18,-21,63,3.46  -21,-27,69,3.5  -42,9,-30,-3.02  -36,21,0,-3.95  3,42,6,-2.92  12,-24,24,-3.32  6,12,24,-3.35  33,-63,45,-3.72 |
| IISongCao.spm_mni | 42,-84,-39,3.59  -24,-84,-30,3.4  -54,-9,-9,3.59  -36,3,0,2.79  36,6,15,3.68  -36,15,30,3.55  33,-12,-30,-4.34  51,-45,-6,-3.16  21,-93,24,-3.41  -21,-81,0,-3.36  33,-60,48,-4.42  -27,-54,57,-3.28 |
| CaoSong,Multimodal MRI study on the herpes zoster pain and postherpetic neuralgia [D]. Shanghai Jiao Tong University,2017. DOI:10.27307/d.cnki.gsjtu.2017.000849. | | | |
| *18 | Liang25 | HHLiangHaoWen.spm_mni | -27,-26,-6,4.16  37,-12,13,2.65  24,-75,-27,5.25  -42,-69,-36,7.06  -24,-3,-33,5.22  29,-1,-27,3.75  6,15,4,3.29  21,-45,-11,3.82  -41,-32,-18,2.76  -4,27,21,3.28  -20,19,-25,3.93  -36,-4,-6,2.85  36,12,15,2.94  13,-72,-48,3.7  -33,-45,-9,4.75  -30,-62,57,3.59  -4,-1,47,3.56  -33,-40,-48,3.97 |
| Liang Haowen,The study of cerebral function in postherpetic neuralgia pain by rest state fMRI [D]. Guangdong: Guangdong Medical University,2013. | | | |
| 35 | Cao et al20 | JJCaoSong.spm_mni | -39,-72,-48,4.56  15,-27,75,3.16  -9,9,33,-3.84  51,-33,54,-3.53  21,-63,51,-3.53 |
| LLSongCao.spm_mni | -9,-51,-54,4.42  36,-66,-48,4.19  -39,-81,-42,3.47  -24,-42,-18,3.95  -9,51,-18,3.92  51,-45,-6,-4.23  36,-78,6,-3.35  -36,-81,3,-3.51  -3,-36,24,-2.76  30,-60,51,-4.67  -33,-48,63,-3.85  45,-39,-33,-4.32 |
| Cao S, Li Y, Deng W, Qin B, Zhang Y, Xie P, Yuan J, Yu B, Yu T. Local Brain Activity Differences Between Herpes Zoster and Postherpetic Neuralgia Patients: A Resting-State Functional MRI Study. Pain Physician. 2017 Jul;20(5):E687-E699. | | | |
| *33 | Liang et al26 | KKLiangHaoWen.spm_mni | 3,-12,6,3.11  7,-78,-18,2.91  30,-35,0,2.95  -9,-9,16,2.78  24,-51,-13,2.91  28,-36,3,3.36 |
| Liang Haowen, XiaoLizu, QiuYunhai, et al.THE COMPARATIVE STUDY OF CEREBRAL FUNCTION IN DIFFERENT PHASES OF HERPES ZOSTER BY REHO fMRI [J]. Chinese Journal of Pain Medicine,2014,20(10):717-721. | | | |
| **Structural(VBM)** | | | |
| *32 | Cao15 | MMCaoSong.spm_mni | -36,-90,-9,-3.89  -3,-60,6,-2.63  0,-93,24,-2.62  54,-54,45,-3.03  -30,-48,63,-2.9  36,-39,60,-2.82  27,-33,-51,4.19  -21,-42,-42,3.27  -3,-30,-36,3.58  -3,9,9,3.07 |
| CaoSong,Multimodal MRI study on the herpes zoster pain and postherpetic neuralgia [D]. Shanghai Jiao Tong University,2017. DOI:10.27307/d.cnki.gsjtu.2017.000849. | | | |
| 12 | Yu et al22 | NNYuTang.spm_mni | -15,-30,-12,-4.8013  -18,9,-6,-3.3369  3,-6,6,4.5786  6,21,6,-3.9766  -12,30,27,-3.4788 |
| Tang Y, Ren C, Wang M, Dai G, Xiao Y, Wang S, Han F, Chen G. Altered gray matter volume and functional connectivity in patients with herpes zoster and postherpetic neuralgia. Brain Res. 2021 Oct 15;1769:147608. doi: 10.1016/j.brainres.2021.147608. Epub 2021 Jul 31. PMID: 34343527. | | | |
| 13 | Liu et al23 | OOJiaqiLiu.spm_mni | 54,-12,48,–4.596  -3,-57,-10.5,4.467  -28.5,-39,-46.5,4.381  -28.5,-7.5,12,4.725 |
| Liu J, Gu L, Huang Q, Hong S, Zeng X, Zhang D, Zhou F, Jiang J. Altered gray matter volume in patients with herpes zoster and postherpetic neuralgia. J Pain Res. 2019 Feb 7;12:605-616. doi: 10.2147/JPR.S183561. | | | |
| **PHN Pre- and Post-Treatment** | | | |
| **Functional(ALFF/fALFF/ReHo)** | | | |
| Record Number | Study | File name | Coordinate information (x,y,z,t-value) |
| *22 | Jiang13 | CCJiangChengCheng.spm_mni | -39,18,-6,3.8087  -9,18,57,9.3805  -27,-39,42,5.8124  -45,-51,30,4.8025  45,-60,45,4.0927  -18,-48,39,6.8258  -48,-63,-21,-5.0075  -36,-72,-21,-4.7851  -60,-48,18,-4.3106  0,-84,-3,-5.5369  -6,45,24,4.1099  -6,30,39,6.2954  -60,-18,15,-6.8784  -42,-45,57,-6.4679 |
| Jiang ChengCheng,The research of postherpetic neuralgia patients with resting state functional MRI and voxel based morphometry [D]. Suzhou University,2017. | | | |
| 8 | Chun et al27 | DDChunXiaoBu.spm_mni | 51,-72,-12,8.6165  15,-90,-12,-11.1194  -27,-72,57,-7.5537  18,-54,69,-10.1811  -15,-57,63,-16.5591 |
| Bu C, Ren H, Lv Q, et al. Alteration of static and dynamic intrinsic brain activity induced by short-term spinal cord stimulation in postherpetic neuralgia patients[J]. Frontiers in Neuroscience, 2023, 17: 1254514. | | | |
| 31 | Zhang et al28 | EEYiZhang.spm_mni | 35,51,3,12.5  -39,35,20,8.9  -36,27,18,10.2  -36,36,-9,6.4  21,27,0,9.1  -18,18,9,21.5  48,-42,27,-25.2  6,-69,6,-10.7  -11,-93,-30,10.8  -30,-45,15,15.1  51,-27,3,12.8  -6,-18,39,11.7  -3,-54,39,12.2  45,-18,-36,-22.1  -55,-32,-20,-14.7  -3,46,-2,-10.8  0,24,42,-36.6  3,30,57,-7.9 |
| Zhang Y, Cao S, Yuan J, et al. Functional and structural changes in postherpetic neuralgia brain before and six months after pain relieving[J]. Journal of pain research, 2020: 909-918. | | | |
| 10 | Fan et al29 | FFXiaoChongFan.spm_mni | -54,-63,9,8.184  18,63,6,7.2821  -3,-60,39,8.7368  -48,-45,33,9.8058  -36,-60,48,7.6008  24,-51,60,6.6291  39,-30,18,-6.5298  27,-72,30,-6.5043 |
| Fan X, Ren H, Bu C, et al. Alterations in local activity and functional connectivity in patients with postherpetic neuralgia after short-term spinal cord stimulation[J]. Frontiers in molecular neuroscience, 2022, 15: 938280. | | | |

Note: * indicates clinical research articles published in Chinese.

## **2.4** Quality Assessment

### **Supplementary Table 5.** Quality Assessment of included studies in the rs-fMRI/VBM meta-analysis

| Record Number | study | standardised diagnostic criteria（1） | Important demographic data were reported with mean and standard deviations（2） | exclude psychiatric and medical illnesses and demographic data was reported（1） | Important clinical variables were reported with mean and standard deviations（4） | Sample size per group > 10（2） | Whole brain analysis was automated（3） | Magnet strength at least 1.5T（1） | At least 5 minutes of resting state acquisition（1） | Whole brain coverage of resting scans（1） | The acquisition and preprocessing techniques were clearly described （1） | Coordinates reported in a standard space（1） | multiple comparison correction（1） | consistent and limitations（1） | Qulity scores (out of 20) |
| --- | --- | --- | --- | --- | --- | --- | --- | --- | --- | --- | --- | --- | --- | --- | --- |
| **PHN vs HC** | |  |  |  |  |  |  |  |  |  |  |  |  |  |  |
| **Functional** | **ALFF/fALFF/ReHo** | |  |  |  |  |  |  |  |  |  |  |  |  |  |
| 2 | Cao9 | 1 | 2 | 1 | 4 | 2 | 3 | 1 | 1 | 1 | 1 | 1 | 1 | 1 | 20 |
| 12 | ZhangYi10 | 1 | 2 | 1 | 4 | 2 | 3 | 1 | 1 | 1 | 1 | 1 | 1 | 1 | 20 |
| 13 | YinRuJiao11 | 1 | 2 | 1 | 3 | 2 | 3 | 1 | 1 | 1 | 1 | 1 | 1 | 1 | 19 |
| 17 | Liao et al12 | 1 | 2 | 1 | 4 | 0 | 3 | 1 | 1 | 1 | 1 | 1 | 1 | 1 | 18 |
| 22 | Jiang13 | 1 | 2 | 1 | 2 | 2 | 3 | 1 | 1 | 1 | 1 | 1 | 1 | 1 | 18 |
| 24 | Bai et al14 | 1 | 1 | 1 | 2 | 2 | 3 | 1 | 1 | 1 | 1 | 1 | 1 | 1 | 17 |
| 32 | Cao15 | 1 | 2 | 1 | 4 | 2 | 3 | 1 | 1 | 1 | 1 | 1 | 1 | 1 | 20 |
| 5 | Huang et al 16 | 1 | 2 | 1 | 4 | 2 | 3 | 1 | 1 | 1 | 1 | 1 | 1 | 1 | 20 |
| 6 | Cao et al17 | 1 | 2 | 1 | 4 | 2 | 3 | 1 | 1 | 1 | 1 | 1 | 1 | 1 | 20 |
| 16 | Gu et al18 | 1 | 2 | 1 | 4 | 2 | 3 | 1 | 1 | 1 | 1 | 1 | 1 | 1 | 20 |
| 22 | Hui et al19 | 1 | 2 | 1 | 2 | 2 | 3 | 1 | 1 | 1 | 1 | 1 | 1 | 1 | 18 |
| 35 | Cao et al20 | 1 | 2 | 1 | 4 | 2 | 3 | 1 | 1 | 1 | 1 | 1 | 1 | 1 | 20 |
| **Structural** | **VBM** |  |  |  |  |  |  |  |  |  |  |  |  |  |  |
| 12 | Zhang10 | 1 | 2 | 1 | 4 | 2 | 3 | 1 | 1 | 1 | 1 | 1 | 0 | 1 | 19 |
| 22 | Jiang13 | 1 | 2 | 1 | 2 | 2 | 3 | 1 | 1 | 1 | 1 | 1 | 1 | 1 | 18 |
| 37 | Wang et al21 | 1 | 2 | 1 | 4 | 2 | 3 | 1 | 1 | 1 | 1 | 1 | 1 | 1 | 20 |
| 12 | Yu et al22 | 1 | 2 | 1 | 4 | 2 | 3 | 1 | 1 | 1 | 1 | 1 | 1 | 1 | 20 |
| 13 | Liu et al23 | 1 | 2 | 1 | 4 | 2 | 3 | 1 | 1 | 1 | 1 | 1 | 1 | 1 | 20 |
| 20 | Li et al24 | 1 | 2 | 1 | 4 | 2 | 3 | 1 | 0 | 1 | 0.5 | 1 | 0 | 0.5 | 17 |
| **PHN vs HZ** | |  |  |  |  |  |  |  |  |  |  |  |  |  |  |
| **Functional** | **ALFF/fALFF/ReHo** | |  |  |  |  |  |  |  |  |  |  |  |  |  |
| 32 | Cao15 | 1 | 2 | 1 | 4 | 2 | 3 | 1 | 1 | 1 | 1 | 1 | 1 | 1 | 20 |
| 18 | Liang25 | 1 | 2 | 1 | 4 | 0 | 3 | 1 | 1 | 1 | 1 | 1 | 0 | 1 | 17 |
| 35 | Cao et al20 | 1 | 2 | 1 | 4 | 2 | 3 | 1 | 1 | 1 | 1 | 1 | 1 | 1 | 20 |
| 33 | Liang et al26 | 1 | 2 | 1 | 4 | 2 | 3 | 1 | 1 | 1 | 1 | 1 | 1 | 1 | 20 |
| **Structural** | **VBM** |  |  |  |  |  |  |  |  |  |  |  |  |  |  |
| 32 | Cao15 | 1 | 2 | 1 | 4 | 2 | 3 | 1 | 1 | 1 | 1 | 1 | 1 | 1 | 20 |
| 12 | Yu at al22 | 1 | 2 | 1 | 4 | 2 | 3 | 1 | 1 | 1 | 1 | 1 | 1 | 1 | 20 |
| 13 | Liu et al23 | 1 | 2 | 1 | 4 | 2 | 3 | 1 | 1 | 1 | 1 | 1 | 1 | 1 | 20 |
| **PHN Pre- and Post-Treatment** | | |  |  |  |  |  |  |  |  |  |  |  |  |  |
| **Functional** | **ALFF/fALFF/ReHo** | |  |  |  |  |  |  |  |  |  |  |  |  |  |
| 22 | Jiang13 | 1 | 2 | 1 | 2 | 2 | 3 | 1 | 1 | 1 | 1 | 1 | 1 | 1 | 18 |
| 8 | Chun et al27 | 1 | 2 | 1 | 2 | 2 | 3 | 1 | 1 | 1 | 1 | 1 | 1 | 1 | 18 |
| 31 | Zhang et al28 | 1 | 2 | 1 | 4 | 2 | 3 | 1 | 1 | 1 | 1 | 1 | 1 | 1 | 20 |
| 10 | Fan et al29 | 1 | 2 | 1 | 2 | 2 | 3 | 1 | 1 | 1 | 1 | 1 | 1 | 1 | 18 |

*** 0.5 for partially satisfied, 0 for otherwise.*

# 3. Results

## **3.1 Glass-brain visualizations**

### **Supplementary Figure 1**. Glass-brain visualization of functional alterations in PHN versus HC (*P*TFCE < 0.05).


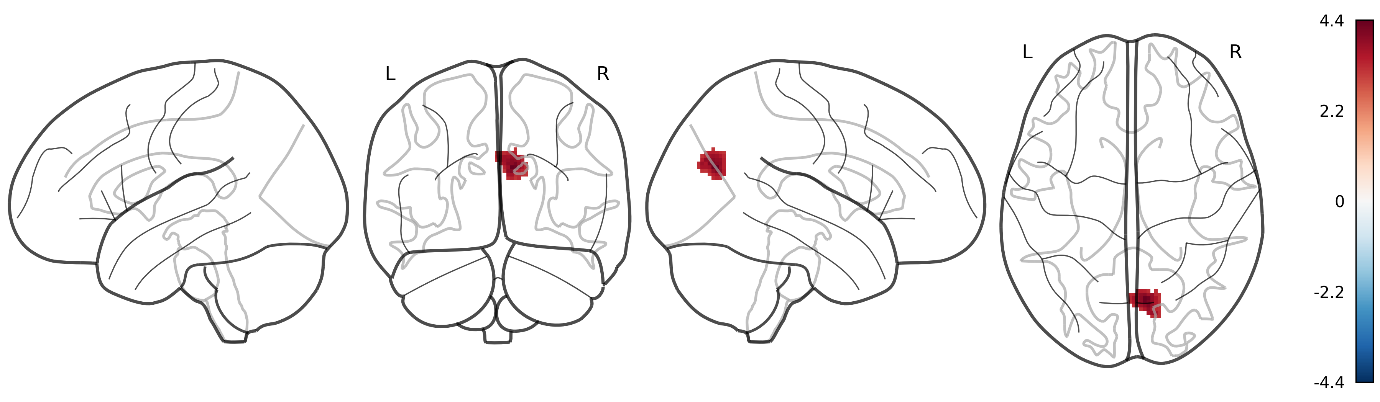


Red indicates increased functional activity in PHN patients relative to HC, whereas blue indicates decreased functional activity. The color bar represents SDM-Z values.

### **Supplementary Figure 2.** Glass-brain visualization of structural alterations in PHN versus HC (*P*TFCE < 0.05).


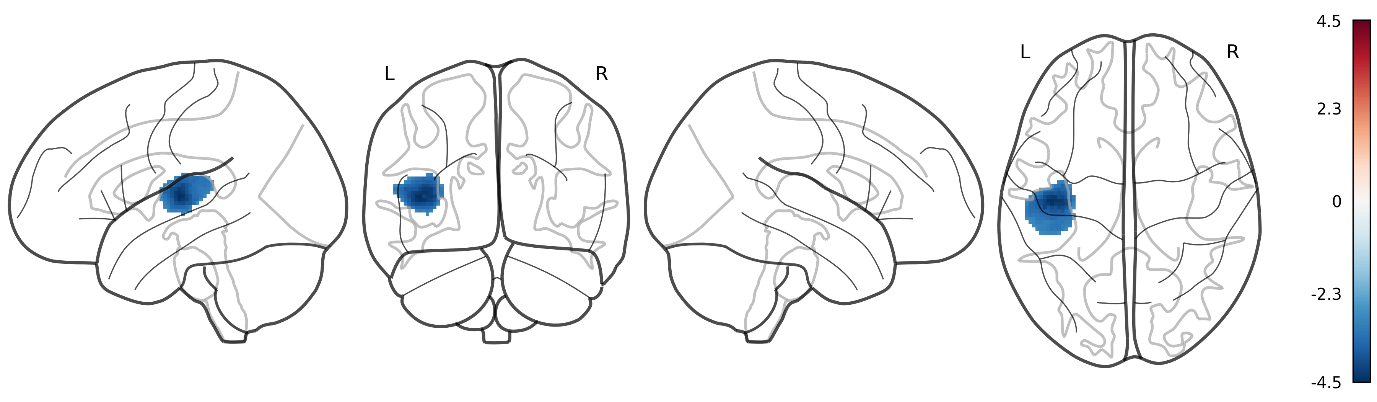


Blue indicates reduced gray matter volume in PHN patients relative to HC, whereas red indicates increased gray matter volume when present. The color bar represents SDM-Z values.

### **Supplementary Figure 3.** Glass-brain visualization of functional alterations in PHN versus HZ patients (*P*TFCE < 0.05).


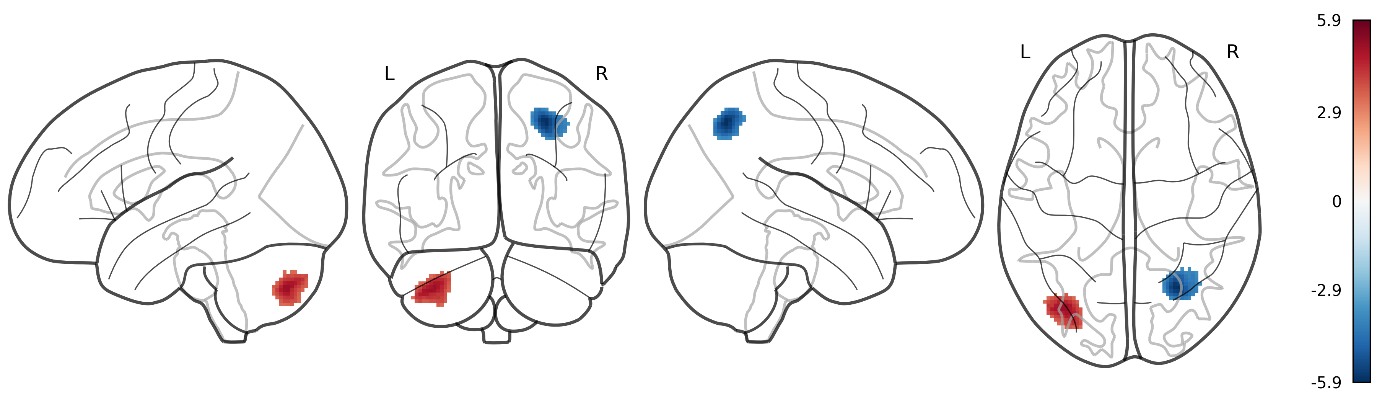


Red indicates increased functional activity in PHN patients relative to HZ patients, whereas blue indicates decreased functional activity. The color bar represents SDM-Z values.

### **Supplementary Figure 4.** Glass-brain visualization of longitudinal functional alterations in PHN pre- and post-treatment (*P*TFCE < 0.05).


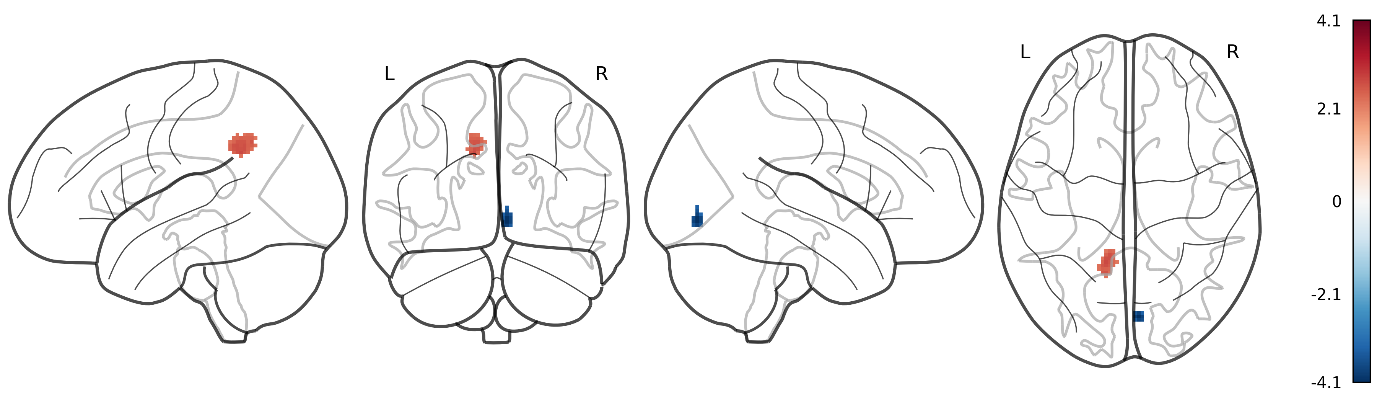
 Red indicates increased functional activity after treatment, whereas blue indicates decreased functional activity after treatment. The color bar represents SDM-Z values.

## **3.2**. Jack-knife sensitivity analysis

### **Supplementary Table 6.** Jack-knife Sensitivity Analysis for rs-fMRI Meta-Analysis (PHN vs HC, *P*uncorrected < 0.005)

| All studies（n-1） | Brain Region of All Studies Overlapping Findings | | | | Brain Region of Multiple Studies Overlapping Findings | |
| --- | --- | --- | --- | --- | --- | --- |
| Right cuneus cortex | Left lenticular nucleus, putamen, BA 48 | Right anterior thalamic projections | Right fusiform gyrus, BA 20 | Right cerebellum, hemispheric lobule VIII | Right cerebellum, hemispheric lobule IV / V, BA 19 |
| Cao 9 | ✔ | ✔ | ✔ | ✔ | ✔ | ✔ |
| ZhangYi10 | ✔ |  | ✔ | ✔ | ✔ |  |
| YinRuJiao11 | ✔ | ✔ |  | ✔ | ✔ |  |
| Liao et al12 | ✔ | ✔ | ✔ | ✔ |  |  |
| Jiang13 | ✔ | ✔ | ✔ |  | ✔ |  |
| Bai et al14 |  |  | ✔ |  | ✔ | ✔ |
| Cao15 | ✔ | ✔ | ✔ | ✔ |  | ✔ |
| Huang et al16 | ✔ | ✔ | ✔ | ✔ | ✔ | ✔ |
| Cao et al17 | ✔ | ✔ | ✔ | ✔ |  |  |
| Gu et al18 | ✔ | ✔ | ✔ | ✔ | ✔ | ✔ |
| Hui et al19 | ✔ | ✔ | ✔ |  | ✔ |  |
| Cao et al20 | ✔ | ✔ | ✔ | ✔ | ✔ | ✔ |
| *Zhang10 | ✔ | ✔ |  | ✔ | ✔ | ✔ |
| *Yin11 | ✔ | ✔ |  | ✔ | ✔ |  |
| *Cao15 | ✔ | ✔ |  |  | ✔ | ✔ |
| *Cao et al17 | ✔ | ✔ |  |  |  |  |
| *Cao et al20 | ✔ | ✔ | ✔ | ✔ | ✔ | ✔ |
| Total | 16 out of 17 | 15 out of 17 | 12 out of 17 | 12 out of 17 | 13 out of 17 | 9 out of 17 |

Note: * indicates datasets analyzed using ReHo (Regional Homogeneity).

### **Supplementary Table 7.** Jack-knife Sensitivity Analysis for rs-fMRI Meta-Analysis (PHN vs HC, *P*TFCE < 0.05)

| All studies（n-1） | Brain Region of All Studies Overlapping Findings |
| --- | --- |
| Right cuneus cortex |
| Cao 9 | ✔ |
| ZhangYi10 | ✔ |
| YinRuJiao11 | ✔ |
| Liao et al12 | ✔ |
| Jiang13 | ✔ |
| Bai et al14 |  |
| Cao15 | ✔ |
| Huang et al16 | ✔ |
| Cao et al17 | ✔ |
| Gu et al18 | ✔ |
| Hui et al19 | ✔ |
| Cao et al20 | ✔ |
| *Zhang10 | ✔ |
| *Yin11 | ✔ |
| *Cao15 | ✔ |
| *Cao et al17 |  |
| *Cao et al20 |  |
| Total | 14 out of 17 |

Note: * indicates datasets analyzed using ReHo (Regional Homogeneity).

### **Supplementary Table 8.** Jack-knife Sensitivity Analysis for VBM Structural MRI Meta-Analysis (PHN vs HC, *P*uncorrected < 0.005)

| All studies（n-1） | Brain Region of All Studies Overlapping Findings | | | Brain Region of Multiple Studies Overlapping Findings |
| --- | --- | --- | --- | --- |
| Right Precentral Gyrus (BA 4) | Left Median Cingulate / Paracingulate | Left Postcentral Gyrus (BA 2) | Left Insula (BA 48) |
| Zhang10 |  |  |  | ✔ |
| Jiang13 | ✔ |  | ✔ | ✔ |
| Wang et al21 | ✔ |  | ✔ |  |
| Yu et al22 | ✔ | ✔ | ✔ |  |
| Liu et al23 |  | ✔ |  | ✔ |
| Li et al24 |  |  |  |  |
| Total | 3 out of 6 | 2 out of 6 | 3 out of 6 | 3 out of 6 |

### **Supplementary Table 9.** Jack-knife Sensitivity Analysis for VBM Structural Meta-Analysis (PHN vs HC, *P*TFCE < 0.05)

| All studies（n-1） | Brain Region of All Studies Overlapping Findings | Brain Region of Multiple Studies Overlapping Findings |
| --- | --- | --- |
| Left Heschl’s Gyrus (BA 48) | Left Insula (BA 48) |
| Zhang10 |  | ✔ |
| Jiang13 |  | ✔ |
| Wang et al21 | ✔ |  |
| Yu et al22 | ✔ |  |
| Liu et al23 |  | ✔ |
| Li et al24 | ✔ |  |
| Total | 3 out of 6 | 3 out of 6 |

### **Supplementary Table 10.** Jack-knife Sensitivity Analysis for comparisons PHN vs HC

| Imaging Type | Jack-knife Sensitivity Analysis | Brain Region | Total of Subsamples (*P*uncorrected < 0.005) | Replication Rate | Total of Subsamples (*P*TFCE < 0.05) | Replication Rate |
| --- | --- | --- | --- | --- | --- | --- |
| Functional changes | Brain Region of All Studies Overlapping Findings | Right cuneus cortex | 16 out of 17 | 0.941 | 14 out of 17 | 0.824 |
| Left lenticular nucleus, putamen, BA 48 | 15 out of 17 | 0.882 | – | – |
| Right anterior thalamic projections | 12 out of 17 | 0.706 | – | – |
| Right fusiform gyrus, BA 20 | 12 out of 17 | 0.706 | – | – |
| Brain Region of Multiple Studies Overlapping Findings | Right cerebellum, hemispheric lobule VIII | 13 out of 17 | 0.765 | – | – |
| Right cerebellum, hemispheric lobule IV / V, BA 19 | 9 out of 17 | 0.529 | – | – |
| Structural changes | Brain Region of All Studies Overlapping Findings | Left Heschl gyrus, BA 48 | 3 out of 6 | 0.500 | 3 out of 6 | 0.500 |
| Right Precentral gyrus, BA 4 | 3 out of 6 | 0.500 | – | – |
| Left Median Cingulate/Paracingulate Gyri | 2 out of 6 | 0.333 | – | – |
| Left Postcentral gyrus, BA 2 | 3 out of 6 | 0.500 | – | – |
| Brain Region of Multiple Studies Overlapping Findings | Left Insula, BA 48 | 3 out of 6 | 0.500 | 3 out of 6 | 0.500 |

### **Supplementary Table 11.** Jack-knife Sensitivity Analysis for rs-fMRI Meta-Analysis (PHN vs HZ, *P*uncorrected < 0.005)

| All studies (n-1) | Brain Region of All Studies Overlapping Findings | | |
| --- | --- | --- | --- |
| Left cerebellum, crus II | Right cerebellum, crus II | Right superior parietal gyrus, BA 7 |
| Cao15 | ✔ | ✔ | ✔ |
| Liang25 | ✔ | ✔ | ✔ |
| *Cao15 | ✔ | ✔ | ✔ |
| Cao et al20 | ✔ |  | ✔ |
| *Liang et al26 | ✔ | ✔ | ✔ |
| *Cao et al20 | ✔ |  | ✔ |
| Total | 6 out of 6 | 4 out of 6 | 6 out of 6 |

Note: * indicates dataset analyzed using ReHo (Regional Homogeneity).

### **Supplementary Table 12.** Jack-knife Sensitivity Analysis for rs-fMRI Meta-Analysis (PHN vs HZ, *P*TFCE < 0.05)

| All studies (n-1) | Brain Region of All Studies Overlapping Findings | |
| --- | --- | --- |
| Left cerebellum, crus II | Right superior parietal gyrus, BA 7 |
| Cao15 | ✔ | ✔ |
| Liang25 | ✔ | ✔ |
| *Cao15 |  |  |
| Cao et al20 | ✔ | ✔ |
| *Liang et al26 | ✔ | ✔ |
| *Cao et al20 | ✔ | ✔ |
| Total | 5 out of 6 | 5 out of 6 |

Note: * indicates datasets analyzed using ReHo (Regional Homogeneity).

### **Supplementary Table 13.** Jack-knife Sensitivity Analysis Results for PHN vs. HZ Comparison

| Imaging Type | Jack-knife Sensitivity Analysis | Brain Region | Total of Reproducible Studies (P uncorrected < 0.005) | Replication Rate | Total of Reproducible Studies(P TFCE < 0.05) | Replication Rate |
| --- | --- | --- | --- | --- | --- | --- |
| Functional changes | Brain Region of All Studies Overlapping Findings | Right cerebellum, crus II | 6 out of 6 | 1.000 | 4 out of 6 | 0.667 |
| Left cerebellum, crus II | 4 out of 6 | 0.667 | 5 out of 6 | 0.833 |
| Right superior parietal gyrus, BA 7 | 6 out of 6 | 1.000 | 5 out of 6 | 0.833 |

### **Supplementary Table 14.** Jack-knife Sensitivity Analysis for rs-fMRI Meta-Analysis (PHN Pre- and Post-Treatment, *P*uncorrected < 0.005, *P*TFCE < 0.05)

| All studies (n-1) | Brain Region of All Studies Overlapping Findings | |
| --- | --- | --- |
| Left median cingulate / paracingulate gyri | Right lingual gyrus, BA 17 |
| Jiang13 | ✔ |  |
| Chun et al27 |  |  |
| Zhang et al28 |  |  |
| *Fan et al29 |  | ✔ |
| Total | 1 out of 4 | 1 out of 4 |

Note: * indicates datasets analyzed using ReHo (Regional Homogeneity).

### **Supplementary Table 15.** Jack-knife Sensitivity Analysis Results for PHN Pre- and Post-Treatment Comparison

| Imaging Type | Jack-knife Sensitivity Analysis | Brain Region | Total of Subsamples (*P*uncorrected < 0.005) | Replication Rate | Total of Subsamples (*P*TFCE < 0.05) | Replication Rate |
| --- | --- | --- | --- | --- | --- | --- |
| Functional changes | Brain Region of All Studies Overlapping Findings | Left median cingulate/paracingulate gyri | 1 out of 4 | 0.250 | 1 out of 4 | 0.250 |
| Right lingual gyrus, BA 17 | 1 out of 4 | 0.250 | 1 out of 4 | 0.250 |

## **3.3** Analysis of Heterogeneity and Publication Bias

### **Supplementary Table 16.** Summary of Meta-Analytic Results: Effect Sizes, Heterogeneity, and Publication Bias for PHN Comparisons Across Functional and Structural Imaging Modalities

| Comparison | Imaging Type | Threshold | Brain Region | Peak Coordinates | Extract test | | | | | | | | | | | | | Metabias Test  (Egger‘s Test) | | | | Excess Significance test |
| --- | --- | --- | --- | --- | --- | --- | --- | --- | --- | --- | --- | --- | --- | --- | --- | --- | --- | --- | --- | --- | --- | --- |
| Estimate（Hedges' g） | *SDM-Z（Hedges' g）* | uncorrp | uncorrp_neg | *τ*2 | *H*2 | *I*2 | *Q*2 | *SDM-Z（Q2）* | uncorrp_neg | corrp_voxel_neg | corrp_tfce | corrp_tfce_neg | *Bias* | *z* | *P-value* | *df* | *P*-value |
| PHN vs HC | Functional changes | *P*TFCE<0.05 | Right cuneus cortex | 8,-70,24 | 0.403062 | 4.411559 | 0.999995 | 0.000005 | 0.003460 | 1.027771 | 2.702088 | 8.290720 | -1.552565 | 0.916 | 0.000 | 0.993 | 0.000 | 1.04 | 0.57 | 0.566 | 15 | 0.520 |
| *P*uncorrected<0.005 | Left lenticular nucleus, putamen | -30,-6,0 | 0.332378 | 3.769818 | 0.999918 | 0.000082 | 0.002605 | 1.022147 | 2.166723 | 11.774594 | -0.704198 | 0.208 | 0.000 | 0.888 | 0.000 | 0.65 | 0.35 | 0.728 | 15 | 0.552 |
| Right anterior thalamic projections | 14,-8,12 | 0.349195 | 3.05084 | 0.998859 | 0.001141 | 0.071753 | 1.630511 | 38.669537 | 18.483437 | 0.534906 | 0.000 | 0.000 | 0.000 | 0.000 | 3.80 | 1.93 | 0.054 | 15 | 0.199 |
| *P*uncorrected<0.005 | Right fusiform gyrus , BA 20 | 44,-36,-28 | -0.312016 | -2.962483 | 0.001526 | 0.998474 | 0.026432 | 1.221656 | 18.143925 | 13.454398 | -0.356558 | 0.000 | -0.001 | 0.000 | 0.194 | -1.45 | -0.75 | 0.452 | 15 | 0.000 |
| Structural changes | *P*TFCE<0.05 | Left heschl gyrus | -42,-16,8 | -0.690643 | -4.510931 | 0.000003 | 0.999997 | 0.004661 | 1.028755 | 2.795088 | 3.105832 | -0.477997 | 0.000 | -0.962 | 0.000 | 0.999 | -0.72 | -0.20 | 0.844 | 4 | 0.399 |
| *P*uncorrected<0.005 | Right precentral gyrus, BA 4 | 54,-6,38 | -0.578683 | -3.229142 | 0.000621 | 0.999379 | 0.032954 | 1.189401 | 15.924041 | 3.557299 | -0.291684 | 0.000 | 0.000 | 0.000 | 0.781 | 0.89 | 0.19 | 0.847 | 4 | 0.999 |
| Left median cingulate / paracingulate gyri | -2,-38,44 | -0.526787 | -2.921902 | 0.001740 | 0.998260 | 0.034447 | 1.214421 | 17.656252 | 4.339704 | -0.004042 | 0.000 | 0.000 | 0.000 | 0.610 | -2.19 | -0.52 | 0.600 | 4 | 0.907 |
| Left postcentral gyrus, BA 2 | -42,-32,44 | -0.529953 | -3.020737 | 0.001261 | 0.998739 | 0.022169 | 1.136569 | 12.015899 | 2.222310 | -0.906283 | 0.000 | 0.000 | 0.000 | 0.016 | 0.84 | 0.20 | 0.844 | 4 | 0.808 |
| PHN vs HZ | Functional changes | *P*TFCE<0.05 | Left cerebellum, crus II | -34,-76,-42 | 0.779260 | 5.074476 | 1.000000 | 0.000000 | 0.008855 | 1.061744 | 5.815318 | 3.837270 | -0.184209 | 0.997 | 0.000 | 0.999 | 0.000 | 0.47 | 0.31 | 0.759 | 4 | 0.000 |
| *P*uncorrected<0.005 | Right cerebellum, crus II | 42,-72,-42 | 0.539110 | 3.414595 | 0.999681 | 0.000319 | 0.007154 | 1.043391 | 4.158621 | 2.925805 | -0.557548 | 0.009 | 0.000 | 0.927 | 0.000 | 0.36 | 0.23 | 0.820 | 4 | 0.384 |
| *P*TFCE<0.05 | Right superior parietal gyrus, BA 7 | 28,-64,50 | -0.838942 | -5.878611 | 0.000000 | 1.000000 | 0.000941 | 1.006685 | 0.664024 | 1.406463 | -1.429746 | 0.000 | -0.999 | 0.000 | 0.999 | 1.11 | 0.70 | 0.481 | 4 | 0.933 |

PHN = Postherpetic Neuralgia; HC = Healthy Controls; HZ = Herpes Zoster.
Hedges' g = standardized mean difference effect size; SDM-*Z* = *Z* value from Seed-based d Mapping;
*τ², H², I², Q²* = heterogeneity metrics; TFCE = threshold-free cluster enhancement;
Bias and Egger's z, p = statistics from Egger’s test for publication bias;Excess significance test P-value refers to the likelihood of observed significant findings exceeding expectation.
“–” indicates insufficient number of studies (n < 10) to conduct bias or excess significance testing.
BA = Brodmann area; Peak coordinates are given in MNI space (x, y, z).

### **Supplementary Figures 5–15.** Funnel plots for publication bias assessment in PHN versus HC and PHN versus HZ comparisons.

| PHN vs HC | | |
| --- | --- | --- |
| 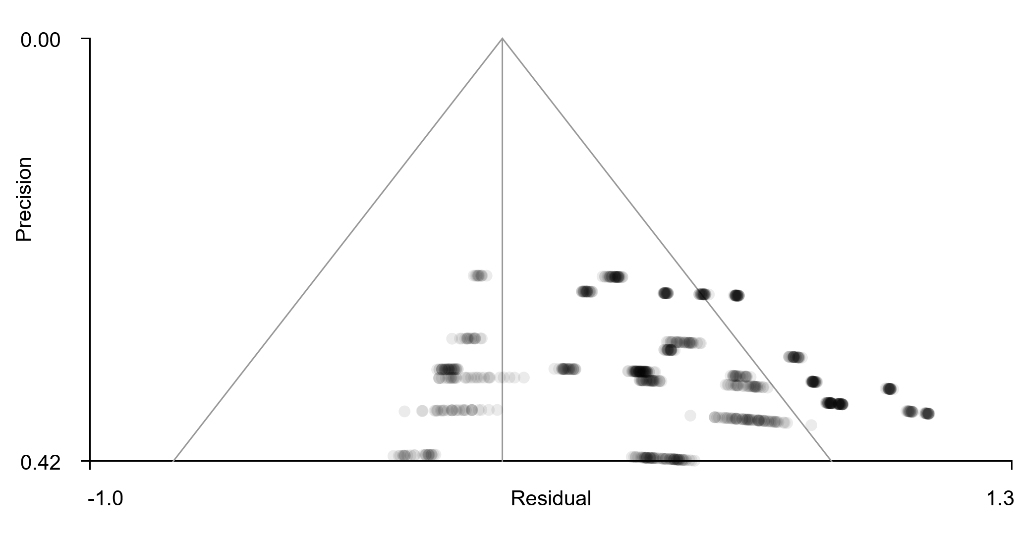 |  | 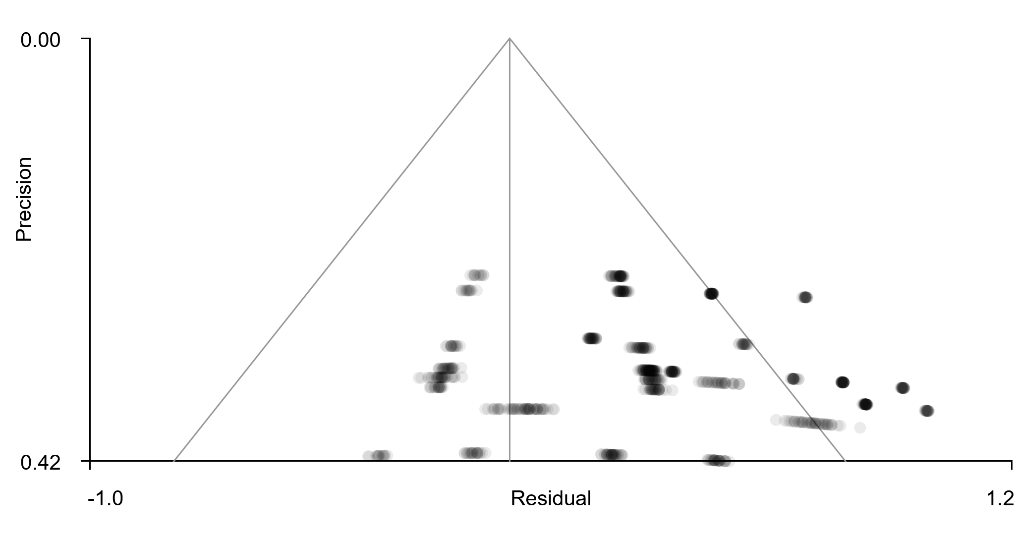 |
| Figure 5. Bias test of funnel plot for Right cuneus cortex(*P*TFCE<0.05) | Figure 6. Bias test of funnel plot for Left lenticular nucleus, putamen , BA 48(*P*uncorrected<0.005) |
| 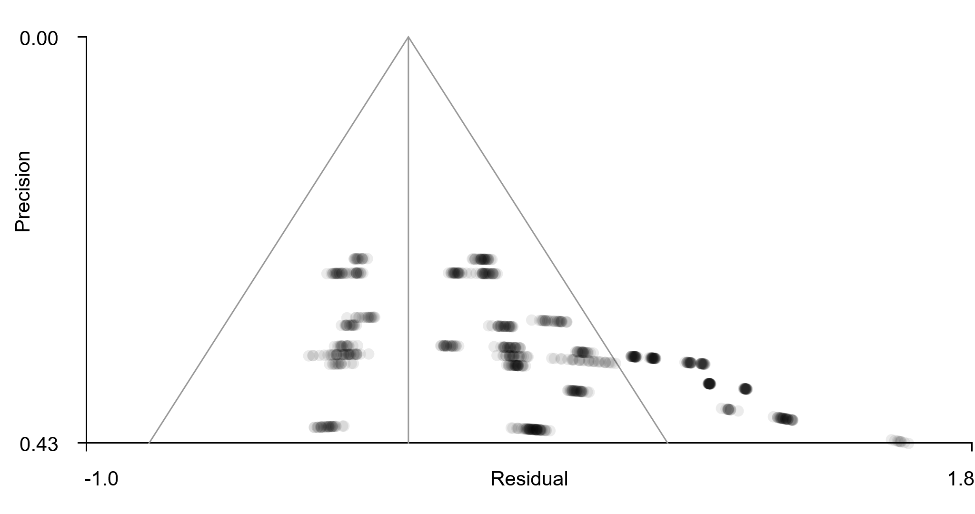 | 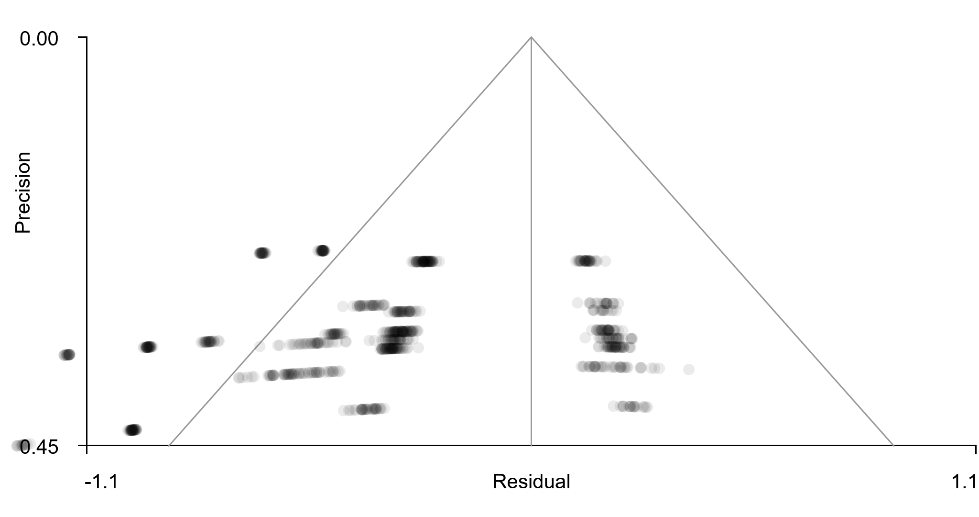 |
| Figure 7. Bias test of funnel plot for Right anterior thalamic projections (*P*uncorrected<0.005) | Figure 8. Bias test of funnel plot for Right fusiform gyrus , BA 20 (*P*uncorrected<0.005) |
| 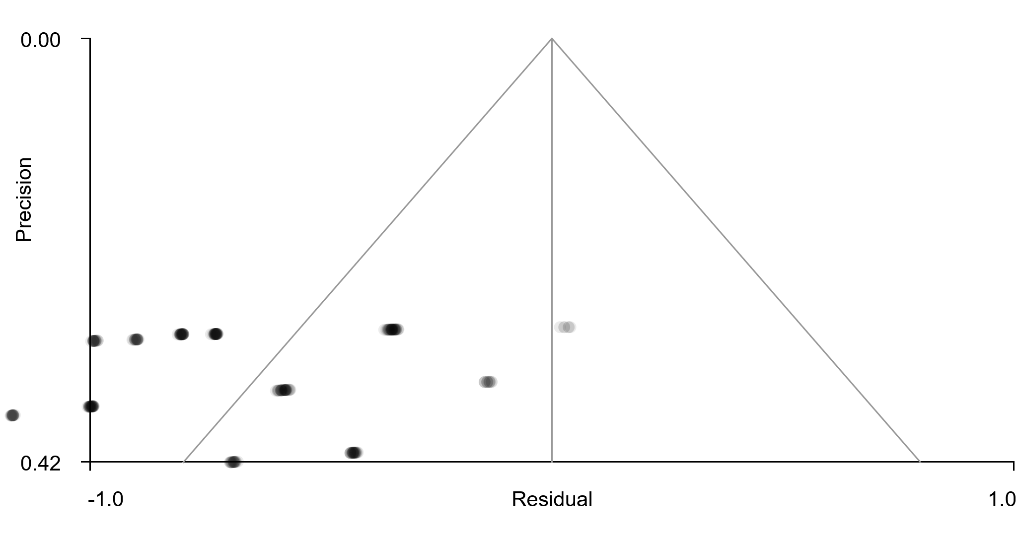 | 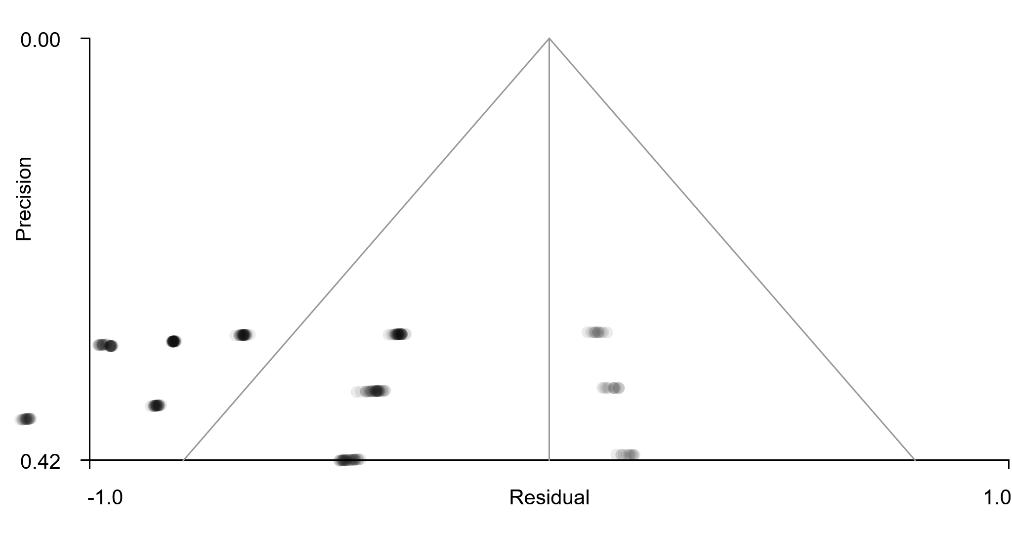 |
| Figure 9. Bias test of funnel plot for Left heschl gyrus, BA 48 (*P*TFCE<0.05) | Figure 10. Bias test of funnel plot for Right precentral gyrus, BA 4 (Puncorrected<0.005) |
| 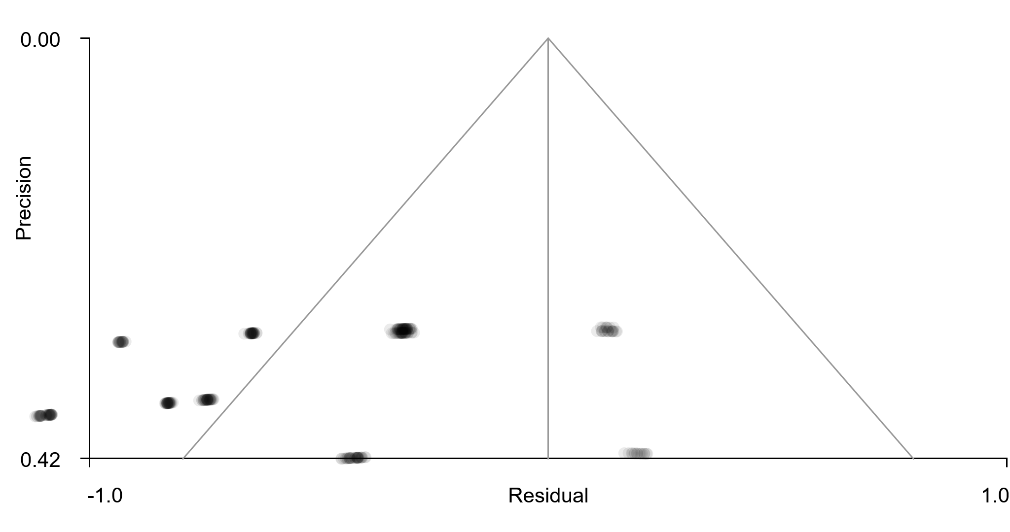 | 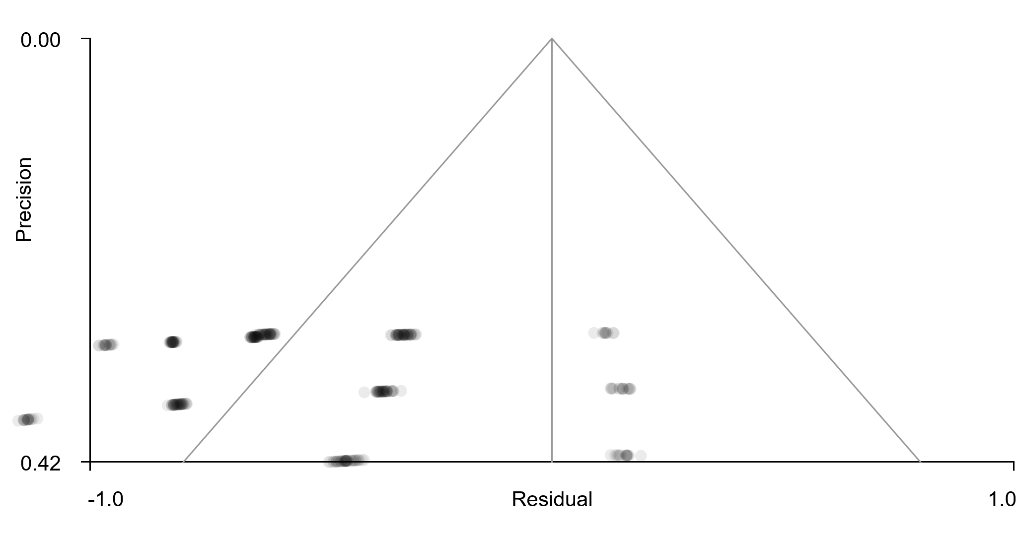 |
| Figure 11. Bias test of funnel plot for Left median cingulate / paracingulate gyri (*P*uncorrected<0.005) | Figure 12. Bias test of funnel plot for Left postcentral gyrus, BA 2 (*P*uncorrected<0.005) |
| PHN vs HZ | | |
| 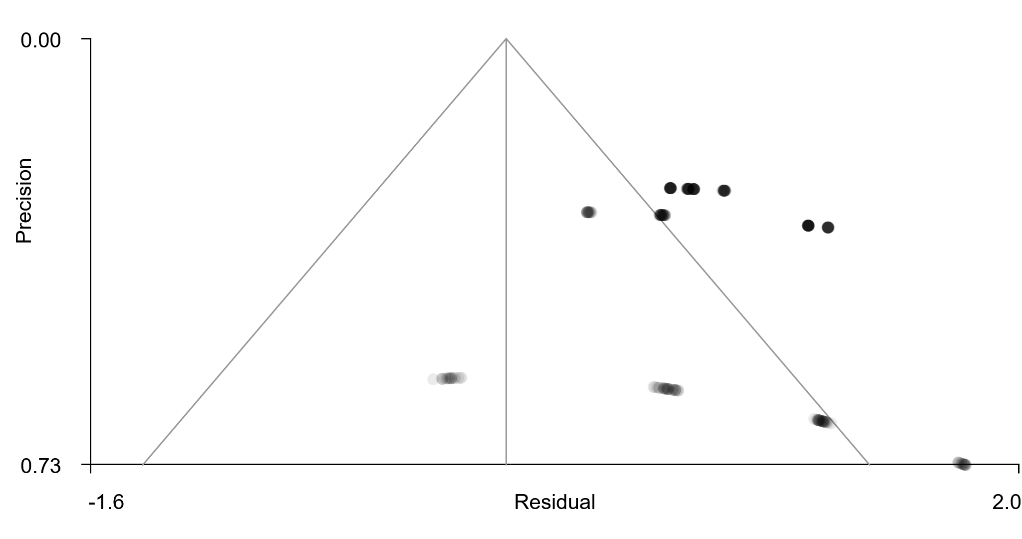 |  | 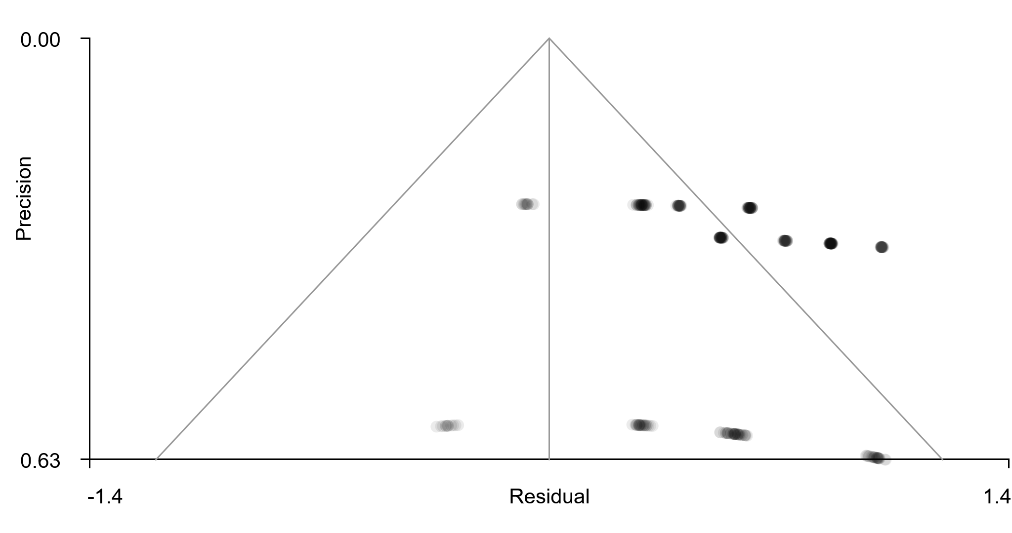 |
| Figure 13. Bias test of funnel plot for Left cerebellum, crus II (*P*TFCE<0.05) | Figure 14. Bias test of funnel plot for Right cerebellum, crus II (*P*uncorrected<0.005) |
| 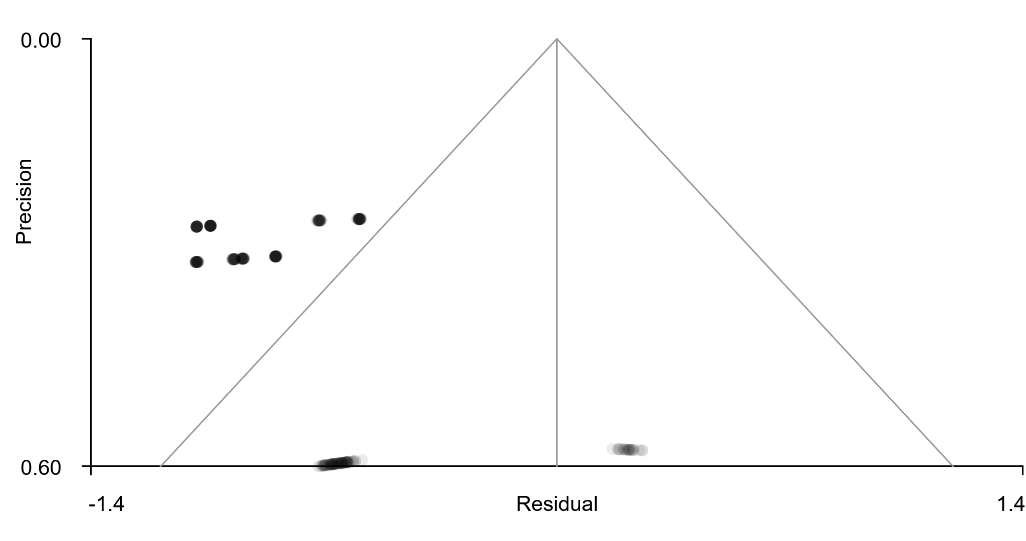 |  |  |
| Figure 15. Bias test of funnel plot for Right superior parietal gyrus, BA 7 (*P*TFCE<0.05) |  |

## **3.4** Meta-regression Analysis

### **Supplementary Table 17.** Meta-regression results for demographic and clinical moderators in PHN

| Group | Change Type | Moderator | Direction | MNI Coordinate | SDM-*Z* value | *P*-value | Voxels | Brain region |
| --- | --- | --- | --- | --- | --- | --- | --- | --- |
| PHN vs HC | Functional | Female | ↑ | -32,-72,-50 | 2.691 | 0.013999999 | 929 | Left cerebellum, hemispheric lobule VIIB |
| Female | ↓ | -4,-18,28 | -3.111 | 0.018999994 | 144 | Posterior anterior cingulate cortex |
| Female | ↓ | -32,16,-6 | -3.063 | 0.032000005 | 68 | Left insula, BA 48 |
| Pain duration | ↑ | -20,-54,-52 | 4.249 | 0.000999987 | 1745 | Left cerebellum, hemispheric lobule VIII |
| VAS | ↑ | 56,-6,8 | 2.928 | 0.021000028 | 247 | Right rolandic operculum, BA 48 |
| VAS | ↑ | 58,-30,-24 | 3.287 | 0.038999975 | 27 | Right inferior temporal gyrus, BA 20 |
| Structural | Female | ↑ | 24,2,-4 | 4.716 | 0.012000024 | 135 | Right striatum |
| Education years | ↑ | -26,-40,-36 | 3.014 | 0.000999987 | 12 | Middle cerebellar peduncles |
| PHN vs HZ | Functional | Pain duration | ↓ | 22,-48,-12 | -3.036 | 0.012000024 | 27 | Right fusiform gyrus, BA 37 |
| Structural | Age | ↑ | -26,0,-2 | 2.496 | 0.000999987 | 484 | Left striatum |
| Female | ↑ | -24,4,-4 | 2.516 | 0.000999987 | 370 | Left lenticular nucleus, putamen, BA 48 |

9. CaoWanYu, *Postherpetic neuralgia in chest and back patients with emotion disorders: A resting state low frequency amplitude study*. 2019, Chinese Medical Sciences University. p. 1-33 (in chinese).

10. ZhangYi, *Multimodal MRI-based study on patients with postherpetic neuralgia*. 2016, Shanghai Jiao Tong University p. 1-88 (in Chinese).

11. Rujiao, Y., *Brain resting state-functional magnetic resonance study in postherpetic neuralgia*. 2017, Kunming Medical University. p. 1-62 (in Chinese).

12. LiaoXiang, et al., *Functional magnetic resonance imaging study on changes in basic brain activity in patients with postherpetic neuralgia.* Progress in Biochemistry and Biophysics, 2015. **42**(10): p. 947-954 (in Chinese).

13. JiangChengcheng, *The research of postherpetic neuralgia patients with resting state functional MRI and voxel based morphometry* 2017, Suzhou University. p. 1-49 (in Chinese).

14. Lala, B., et al., *Magnetic Resonance Imaging Study of Brain Function and Structure Changes in Patients with Post-herpetic Neuralgia.* Imaging Science & Photochemistry, 2022. **40**(2).

15. Song, C., *Multimodal MRI study on the herpes zoster pain and postherpetic neuralgia*. 2017, Shanghai Jiao Tong University. p. 3-95 (in Chinese).

16. Huang, J., et al., *Abnormal intrinsic brain activity and neuroimaging-based fMRI classification in patients with herpes zoster and postherpetic neuralgia.* Frontiers in neurology, 2020. **11**: p. 532110.

17. Cao, S., et al., *Abnormal local brain activity beyond the pain matrix in postherpetic neuralgia patients: a resting-state functional MRI study.* Pain Physician, 2017. **20**(2): p. E303.

18. Gu, L., et al., *Bidirectional alterations in ALFF across slow-5 and slow-4 frequencies in the brains of postherpetic neuralgia patients.* Journal of pain research, 2018: p. 39-47.

19. Dai, H., et al., *A combined DTI and resting state functional MRI study in patients with postherpetic neuralgia.* Japanese journal of radiology, 2020. **38**(5): p. 440-450.

20. Cao, S., et al., *Local brain activity differences between herpes zoster and postherpetic neuralgia patients: a resting-state functional MRI study.* Pain Physician, 2017. **20**(5): p. E687.

21. WANG, S., et al., *Observation of morphological changes of brain gray matter volume in patients with postherpetic neuralgia using VBM-DARTEL method.* Journal of Practical Radiology, 2017: p. 1337-1340, 1356.

22. Tang, Y., et al., *Altered gray matter volume and functional connectivity in patients with herpes zoster and postherpetic neuralgia.* Brain research, 2021. **1769**: p. 147608.

23. Liu, J., et al., *Altered gray matter volume in patients with herpes zoster and postherpetic neuralgia.* Journal of pain research, 2019: p. 605-616.

24. Niu, L., et al., *Cerebral structural alterations in the patients undergoing postherpetic neuralgia: A VBM–MRI study.* iBrain, 2022. **8**(2): p. 119-126.

25. Haowen, L., *The study of cerebral function in postherpetic neuralgia pain by rest state fMRI*. 2013, Guangdong Medical College. p. 6-47 (in Chinese).

26. Haowen, L., et al., *The comparative study of cerebral function in different phases of herpes zoster by ReHO fMRI.* Chinese Journal of Pain Medicine, 2014. **20**(10): p. 717-721 （in Chinese).

27. Bu, C., et al., *Alteration of static and dynamic intrinsic brain activity induced by short-term spinal cord stimulation in postherpetic neuralgia patients.* Frontiers in Neuroscience, 2023. **17**: p. 1254514.

28. Zhang, Y., et al., *Functional and structural changes in postherpetic neuralgia brain before and six months after pain relieving.* Journal of pain research, 2020: p. 909-918.

29. Fan, X., et al., *Alterations in local activity and functional connectivity in patients with postherpetic neuralgia after short-term spinal cord stimulation.* Frontiers in molecular neuroscience, 2022. **15**: p. 938280.

# References：
